# Supplementary material
Source: PubMed Central journal article supplement (PMC7869588)
Supplement: NIHMS1644571-supplement-Supplementary_Materials.pdf [file NIHMS1644571-supplement-Supplementary_Materials.pdf]

## *Supporting Information*

# **Antibacterial Kaneoheic acids A-F from a Hawaiian Fungus**

## ***Fusarium* sp. FM701**

KH Ahammad Uz Zaman<sup>a</sup>, Xiaohua Wu<sup>a</sup>, Zhenquan Hu<sup>b,c</sup>, Wesley Yoshida<sup>d</sup>, Shaobin Hou<sup>e</sup>, Jennifer Saito<sup>e</sup>, Kristiana Alexes Avad<sup>f</sup>, Kirk E. Hevener<sup>f</sup>, John N. Alumasa<sup>g</sup>, Shugeng Cao<sup>a,h\*</sup>

*a*Department of Pharmaceutical Sciences, Daniel K. Inouye College of Pharmacy, University of Hawai'i at Hilo, Hilo, Hawaii 96720, United States *b*Warshel Institute for Computational Biology, The Chinese University of Hong Kong, Shenzhen, People's Republic of China *c*School of Chemistry and Materials Science, University of Science and Technology of China, People's Republic of China *d*Department of Chemistry, University of Hawai'i at Manoa, Hawaii, United States *e*Advanced Studies in Genomics, Proteomics and Bioinformatics (ASGPB), University of Hawai'i at Manoa, Honolulu, Hawaii 96822, United States *f*College of Pharmacy, University of Tennessee Health Science Center *g*Department of Biochemistry and Molecular Biology, Pennsylvania State University, United States *h*Cancer Biology Program, University of Hawaii Cancer Center, 701 Ilalo Street, Honolulu, Hawai'i 96813, United States

\*Corresponding author.

Shugeng Cao. Tel: +1 (808) 981 8010

Email: [scao@hawaii.edu](mailto:scao@hawaii.edu)

## Table of Contents

| Figures    | Content                                                                      | Page |
|------------|------------------------------------------------------------------------------|------|
| Figure S1  | HRESIMS of compound 1                                                        | 4    |
| Figure S2  | <sup>1</sup> H NMR spectrum of compound 1 in CD <sub>3</sub> OD (400MHz)     | 5    |
| Figure S3  | HSQC spectrum of compound 1 in CD <sub>3</sub> OD (400MHz)                   | 6    |
| Figure S4  | COSY spectrum of compound 1 in CD <sub>3</sub> OD (400MHz)                   | 7    |
| Figure S5  | HMBC spectrum of compound 1 in CD <sub>3</sub> OD (400MHz)                   | 8    |
| Figure S6  | HRESIMS of compound 2                                                        | 9    |
| Figure S7  | <sup>1</sup> H NMR spectrum of compound 2 in CD <sub>3</sub> OD (400MHz)     | 10   |
| Figure S8  | HSQC spectrum of compound 2 in CD <sub>3</sub> OD (400MHz)                   | 11   |
| Figure S9  | COSY spectrum of compound 2 in CD <sub>3</sub> OD (400MHz)                   | 12   |
| Figure S10 | HMBC spectrum of compound 2 in CD <sub>3</sub> OD (400MHz)                   | 13   |
| Figure S11 | ROESY spectrum of compound 2 in CD <sub>3</sub> OD (400MHz)                  | 14   |
| Table S1   | Calculated and experimental NMR of compound 2 in CD <sub>3</sub> OD (400MHz) | 15   |
| Figure S12 | HRESIMS of compound 3                                                        | 16   |
| Figure S13 | <sup>1</sup> H NMR spectrum of compound 3 in CD <sub>3</sub> OD (400MHz)     | 17   |
| Figure S14 | HSQC spectrum of compound 3 in CD <sub>3</sub> OD (400MHz)                   | 18   |
| Figure S15 | COSY spectrum of compound 3 in CD <sub>3</sub> OD (400MHz)                   | 19   |
| Figure S16 | HMBC spectrum of compound 3 in CD <sub>3</sub> OD (400MHz)                   | 20   |
| Figure S17 | ROESY spectrum of compound 3 in CD <sub>3</sub> OD (400MHz)                  | 21   |

|            |                                                                                                                                                                                  |    |
|------------|----------------------------------------------------------------------------------------------------------------------------------------------------------------------------------|----|
| Figure S18 | HRESIMS of compound 4                                                                                                                                                            | 22 |
| Figure S19 | <sup>1</sup> H NMR spectrum of compound 4 in CD <sub>3</sub> OD (400MHz)                                                                                                         | 23 |
| Figure S20 | HSQC spectrum of compound 4 in CD <sub>3</sub> OD (400MHz)                                                                                                                       | 24 |
| Figure S21 | COSY spectrum of compound 4 in CD <sub>3</sub> OD (400MHz)                                                                                                                       | 25 |
| Figure S22 | HMBC spectrum of compound 4 in CD <sub>3</sub> OD (400MHz)                                                                                                                       | 26 |
| Figure S23 | ROESY spectrum of compound 4 in CD <sub>3</sub> OD (400MHz)                                                                                                                      | 27 |
| Figure S24 | HRESIMS of compound 5                                                                                                                                                            | 28 |
| Figure S25 | <sup>1</sup> H NMR spectrum of compound 5 in CD <sub>3</sub> OD (400MHz)                                                                                                         | 29 |
| Figure S26 | HSQC spectrum of compound 5 in CD <sub>3</sub> OD (400MHz)                                                                                                                       | 30 |
| Figure S27 | COSY spectrum of compound 5 in CD <sub>3</sub> OD (400MHz)                                                                                                                       | 31 |
| Figure S28 | HMBC spectrum of compound 5 in CD <sub>3</sub> OD (400MHz)                                                                                                                       | 32 |
| Figure S29 | HRESIMS of compound 6                                                                                                                                                            | 33 |
| Figure S30 | <sup>1</sup> H NMR spectrum of compound 6 in CD <sub>3</sub> OD (400MHz)                                                                                                         | 34 |
| Figure S31 | HSQC spectrum of compound 6 in CD <sub>3</sub> OD (400MHz)                                                                                                                       | 35 |
| Figure S32 | COSY spectrum of compound 6 in CD <sub>3</sub> OD (400MHz)                                                                                                                       | 36 |
| Figure S33 | HMBC spectrum of compound 6 in CD <sub>3</sub> OD (400MHz)                                                                                                                       | 37 |
| Table S2   | Activities of Compounds 1-6 against <i>S. aureus</i> (ATCC <sup>®</sup> 12600 <sup>TM</sup> ) and <i>Bacillus subtilis</i> (ATCC <sup>®</sup> 6633 <sup>TM</sup> )               | 38 |
| Table S3   | Activities of Small to medium chain fatty acids against <i>S. aureus</i> (ATCC <sup>®</sup> 12600 <sup>TM</sup> ) and <i>B. subtilis</i> (ATCC <sup>®</sup> 6633 <sup>TM</sup> ) | 39 |

**Figure S1: HRESIMS of compound 1**

KH Ahammad Zaman ZS 5

SYNAPT G2-Si#NotSet  
09:12:36  
1: TOF MS ES-  
5.64e5

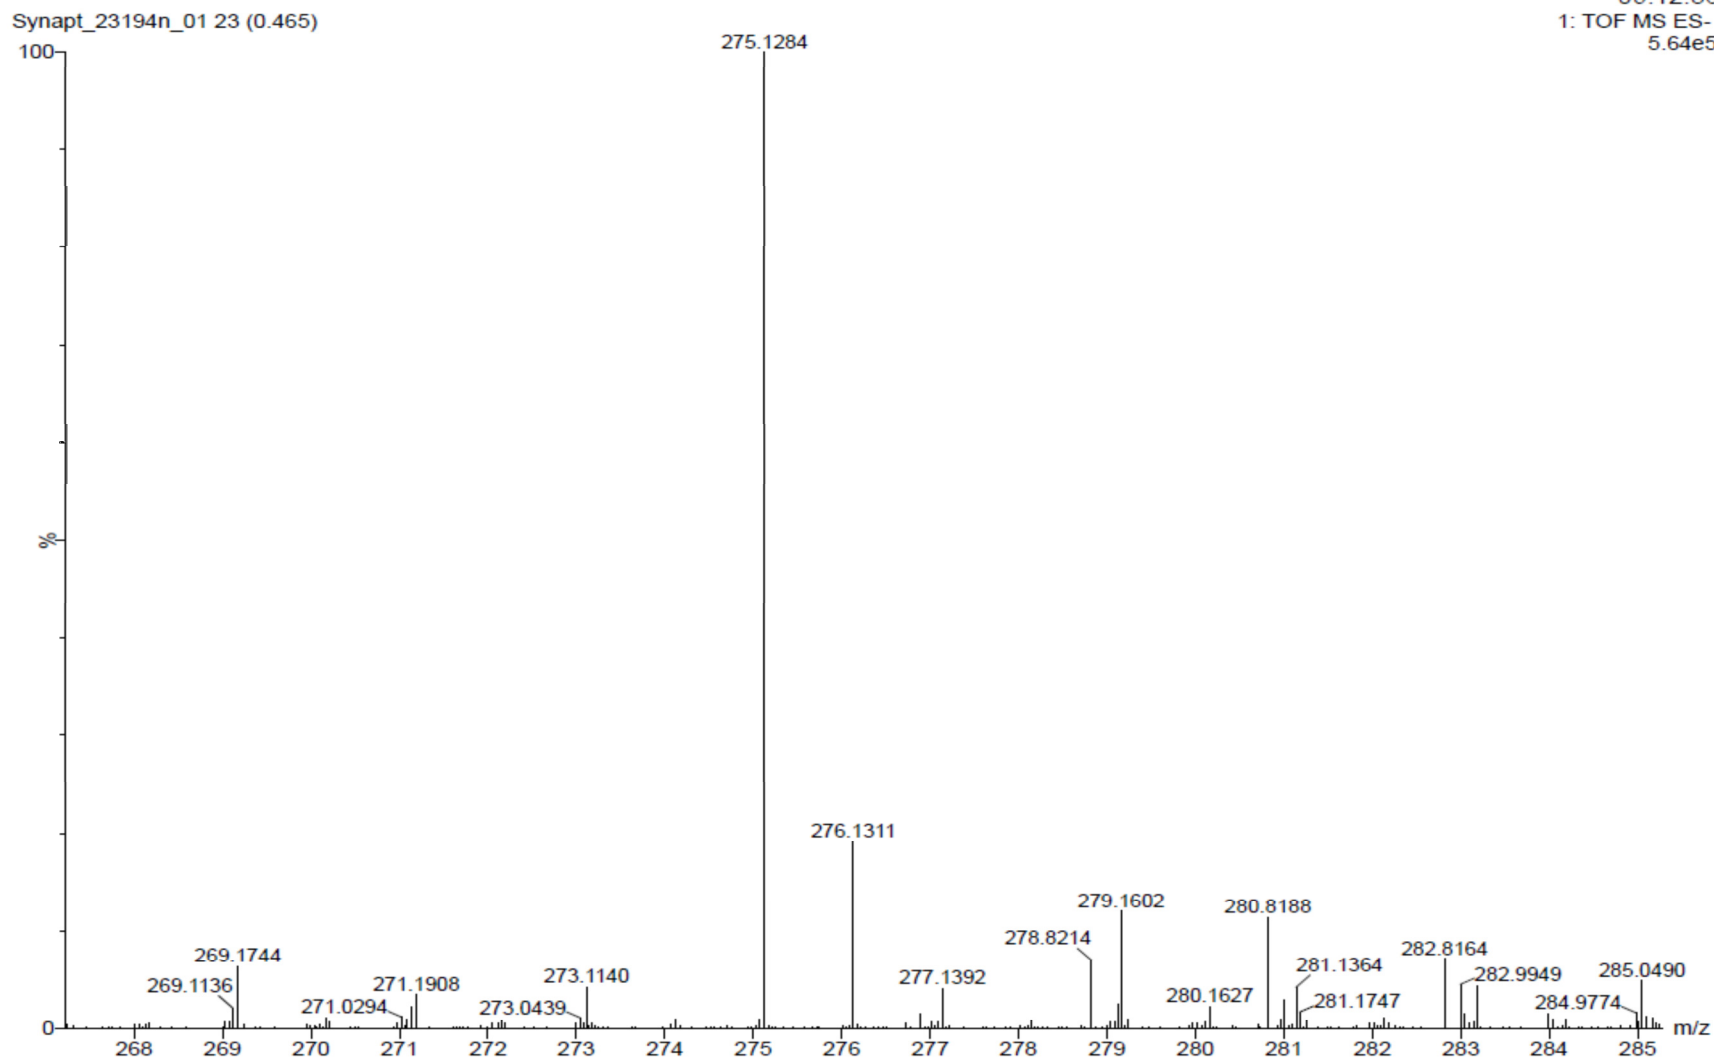

Figure S2:  $^1\text{H}$  NMR spectrum of compound 1 in  $\text{CD}_3\text{OD}$  (400MHz)

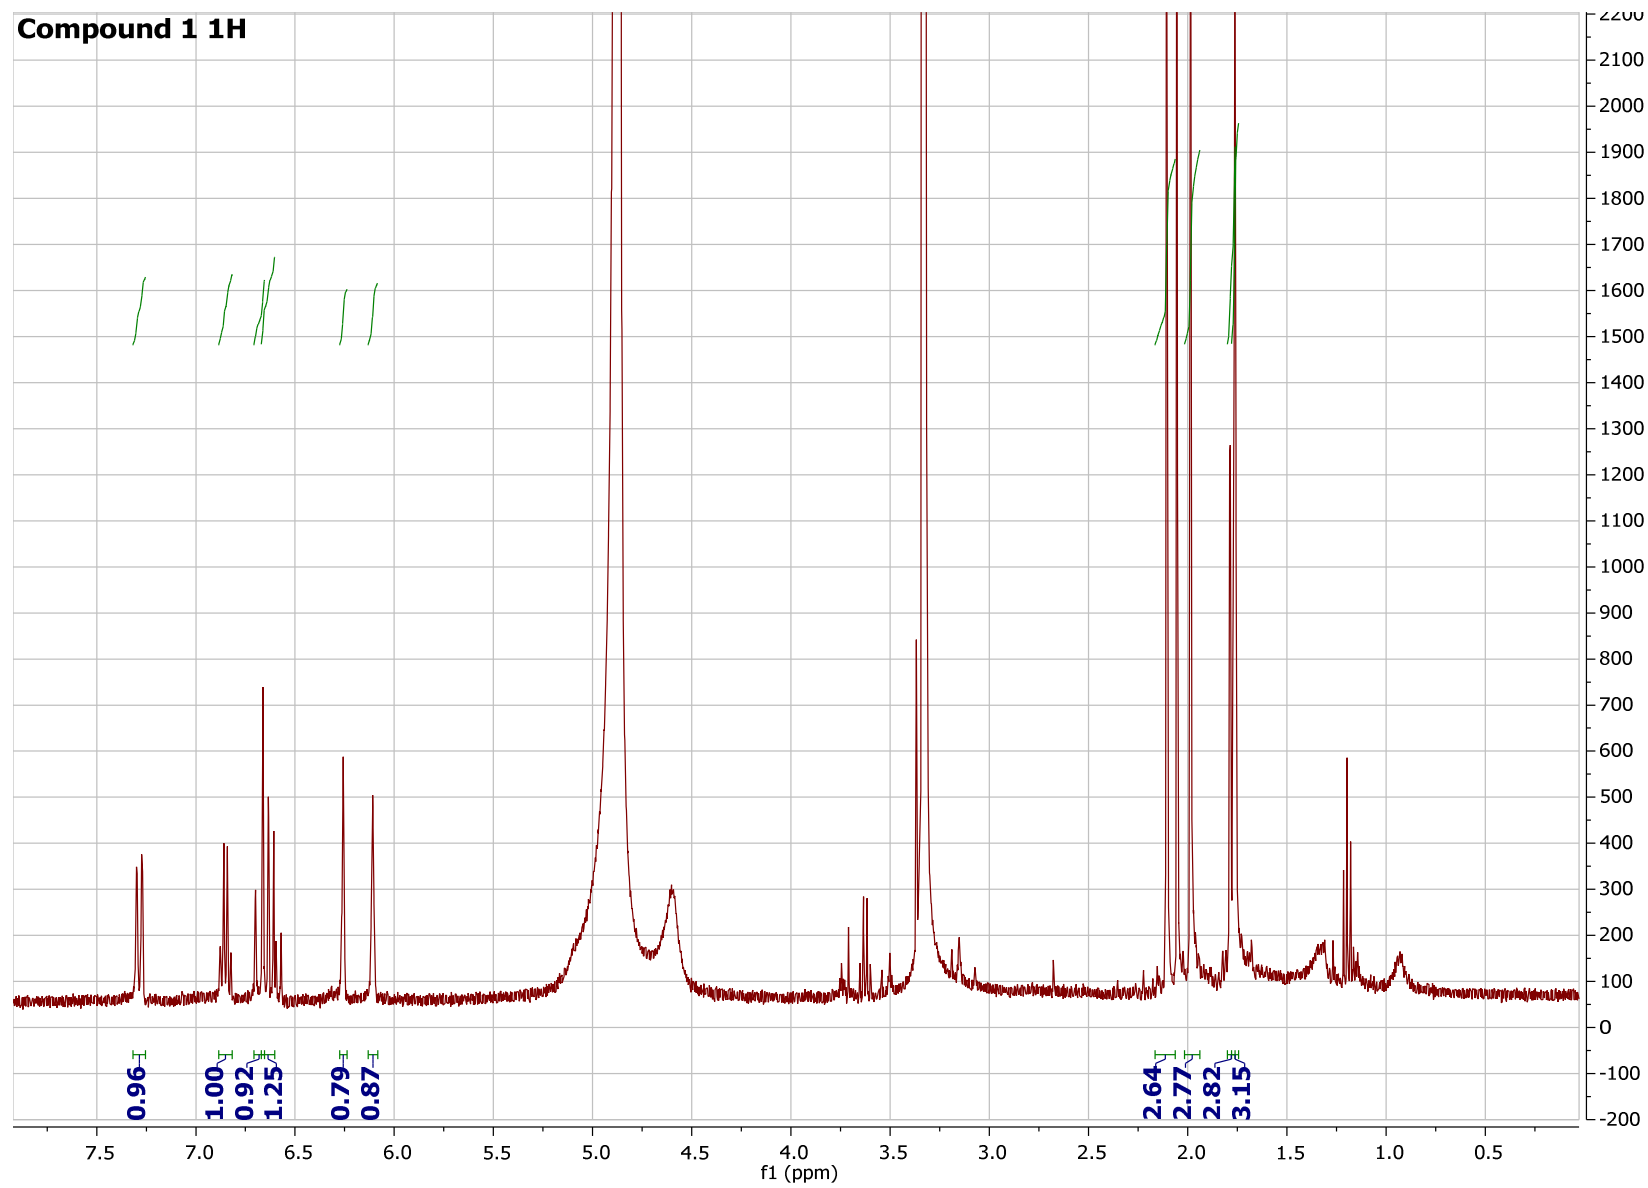

Figure S3: HSQC spectrum of compound 1 in CD<sub>3</sub>OD (400MHz)

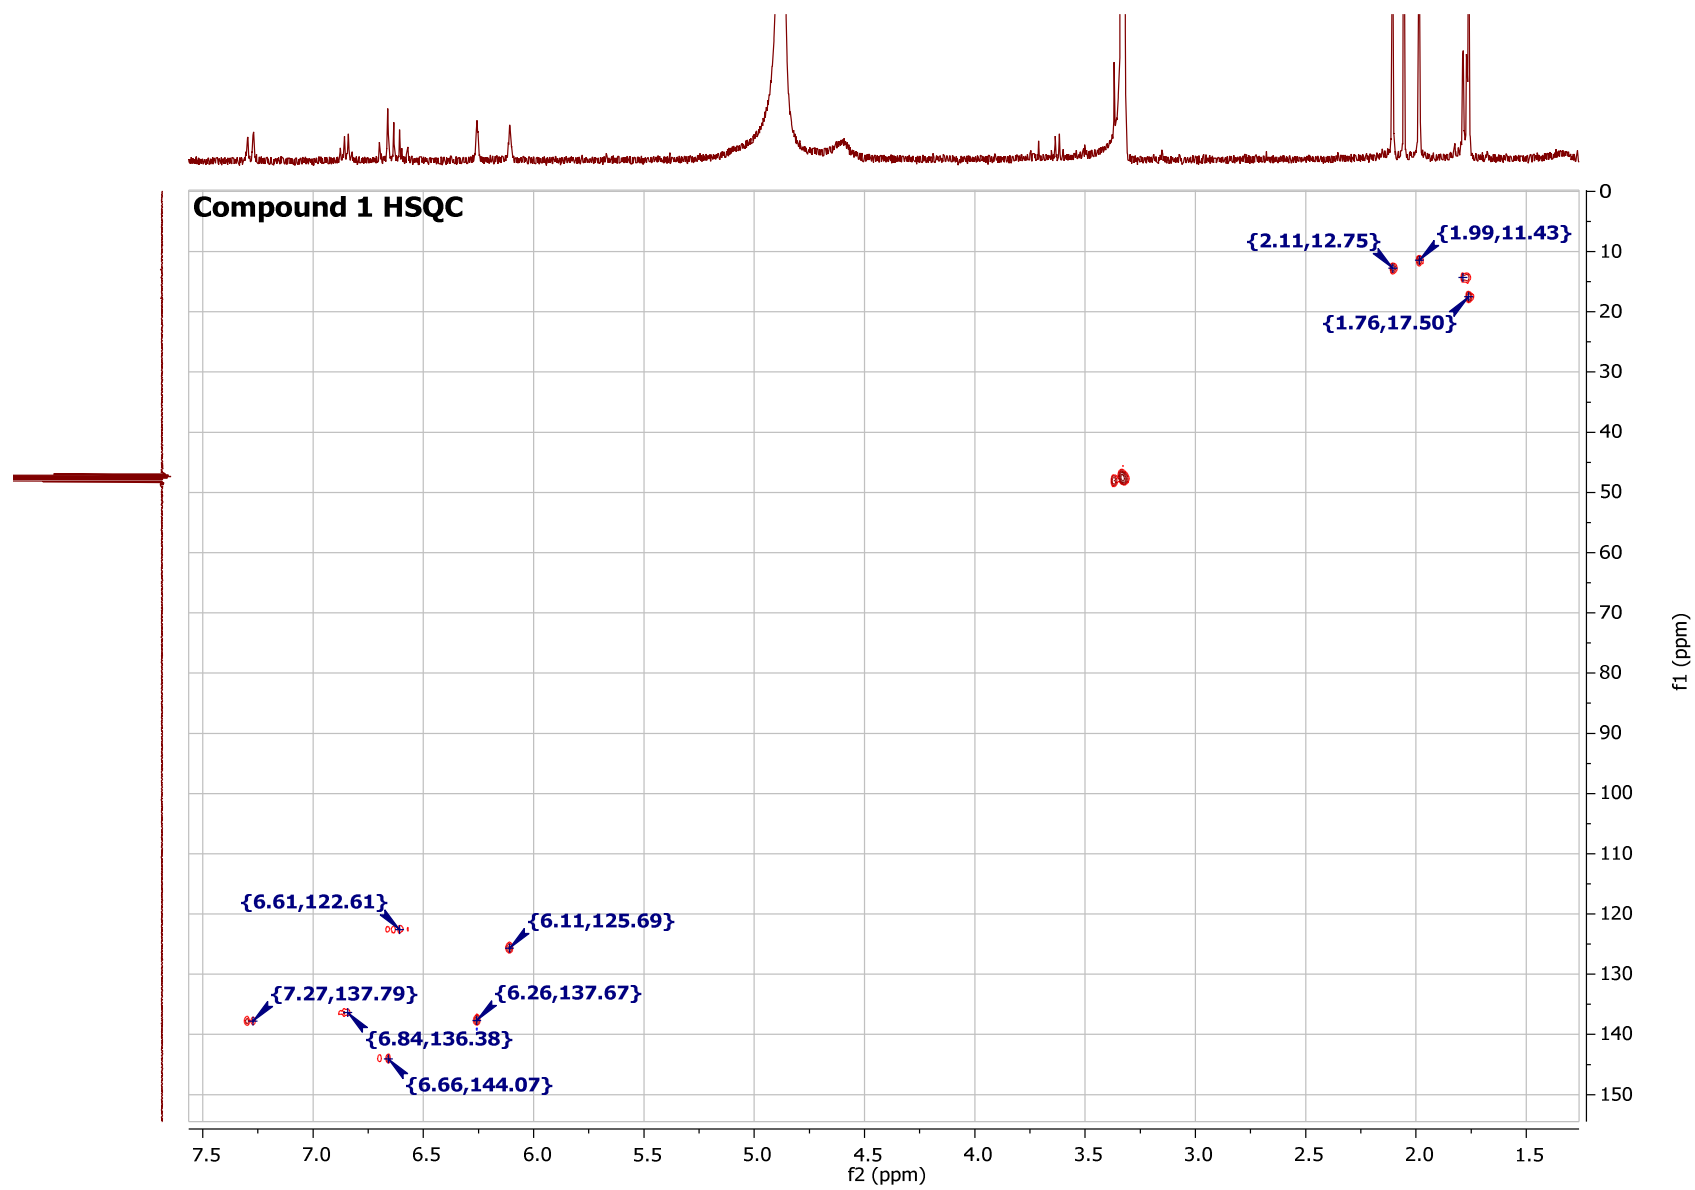

Figure S4: COSY spectrum of compound 1 in CD<sub>3</sub>OD (400MHz)

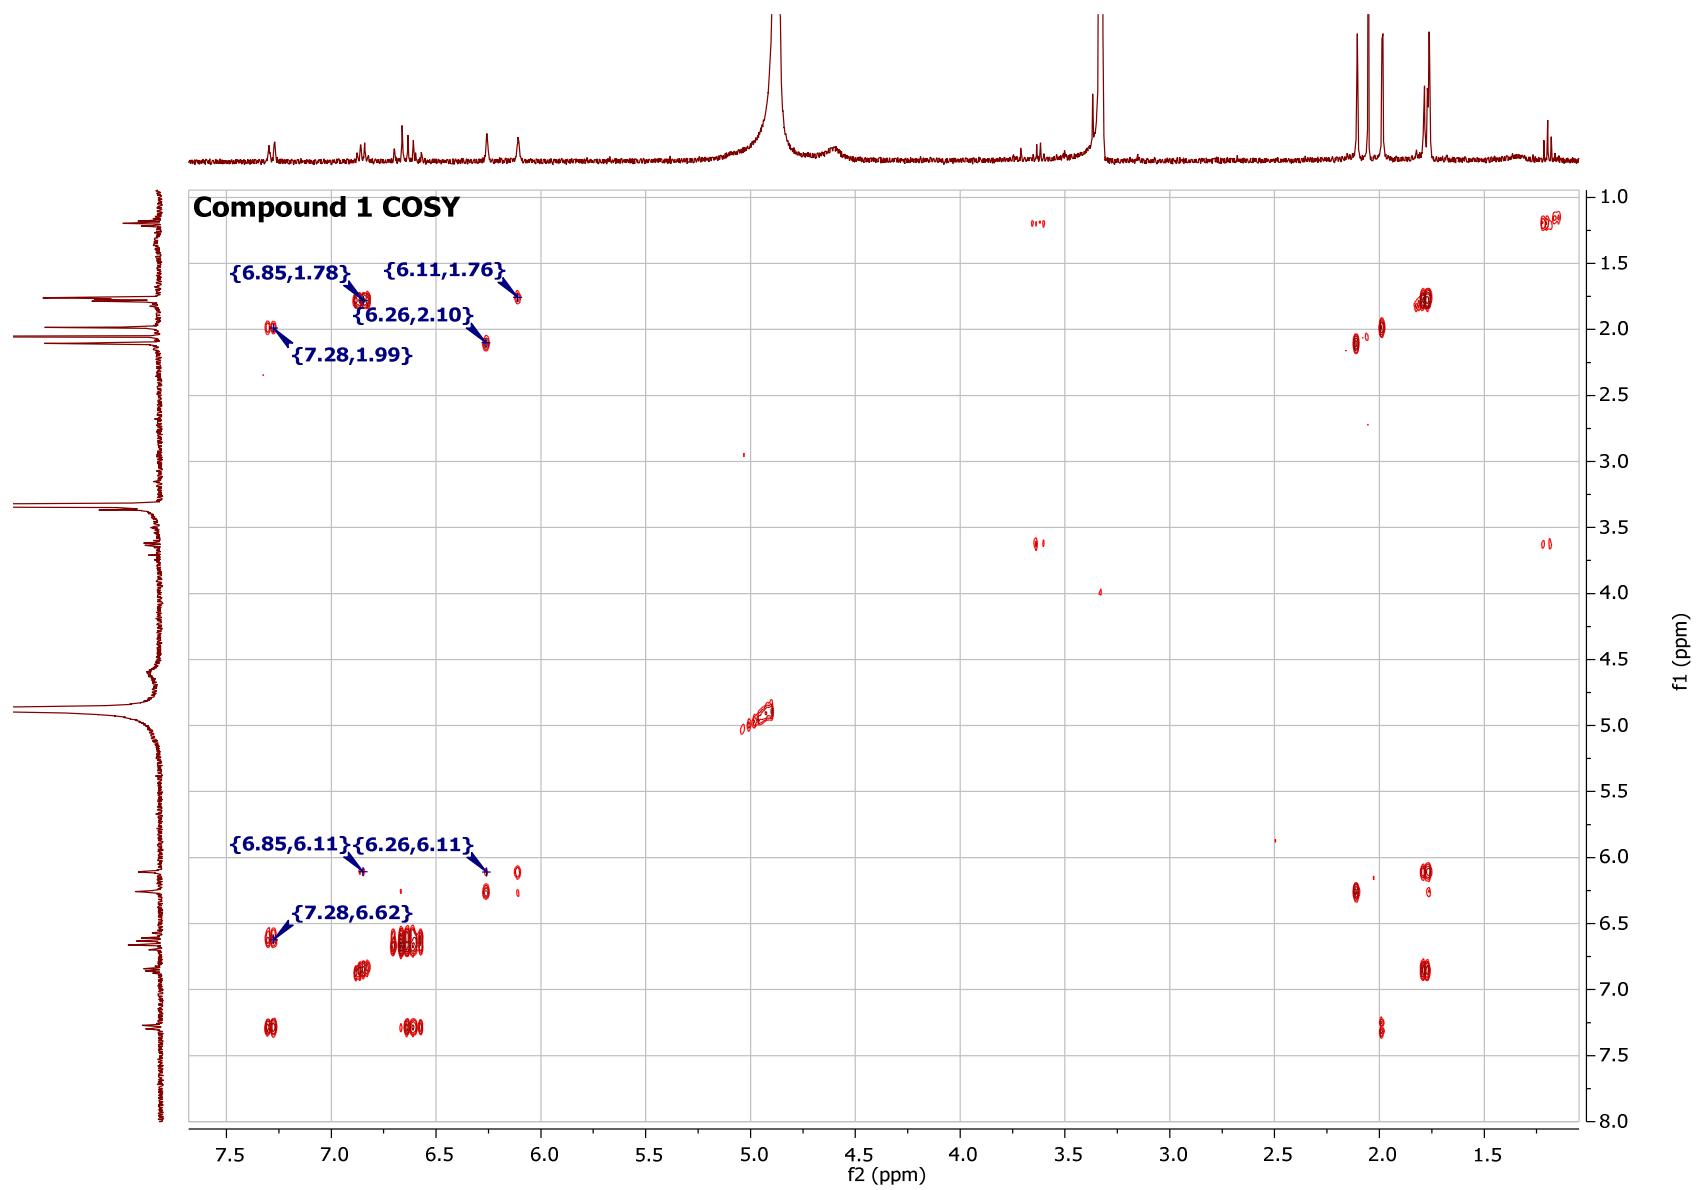

Figure S5: HMBC spectrum of compound 1 in CD<sub>3</sub>OD (400MHz)

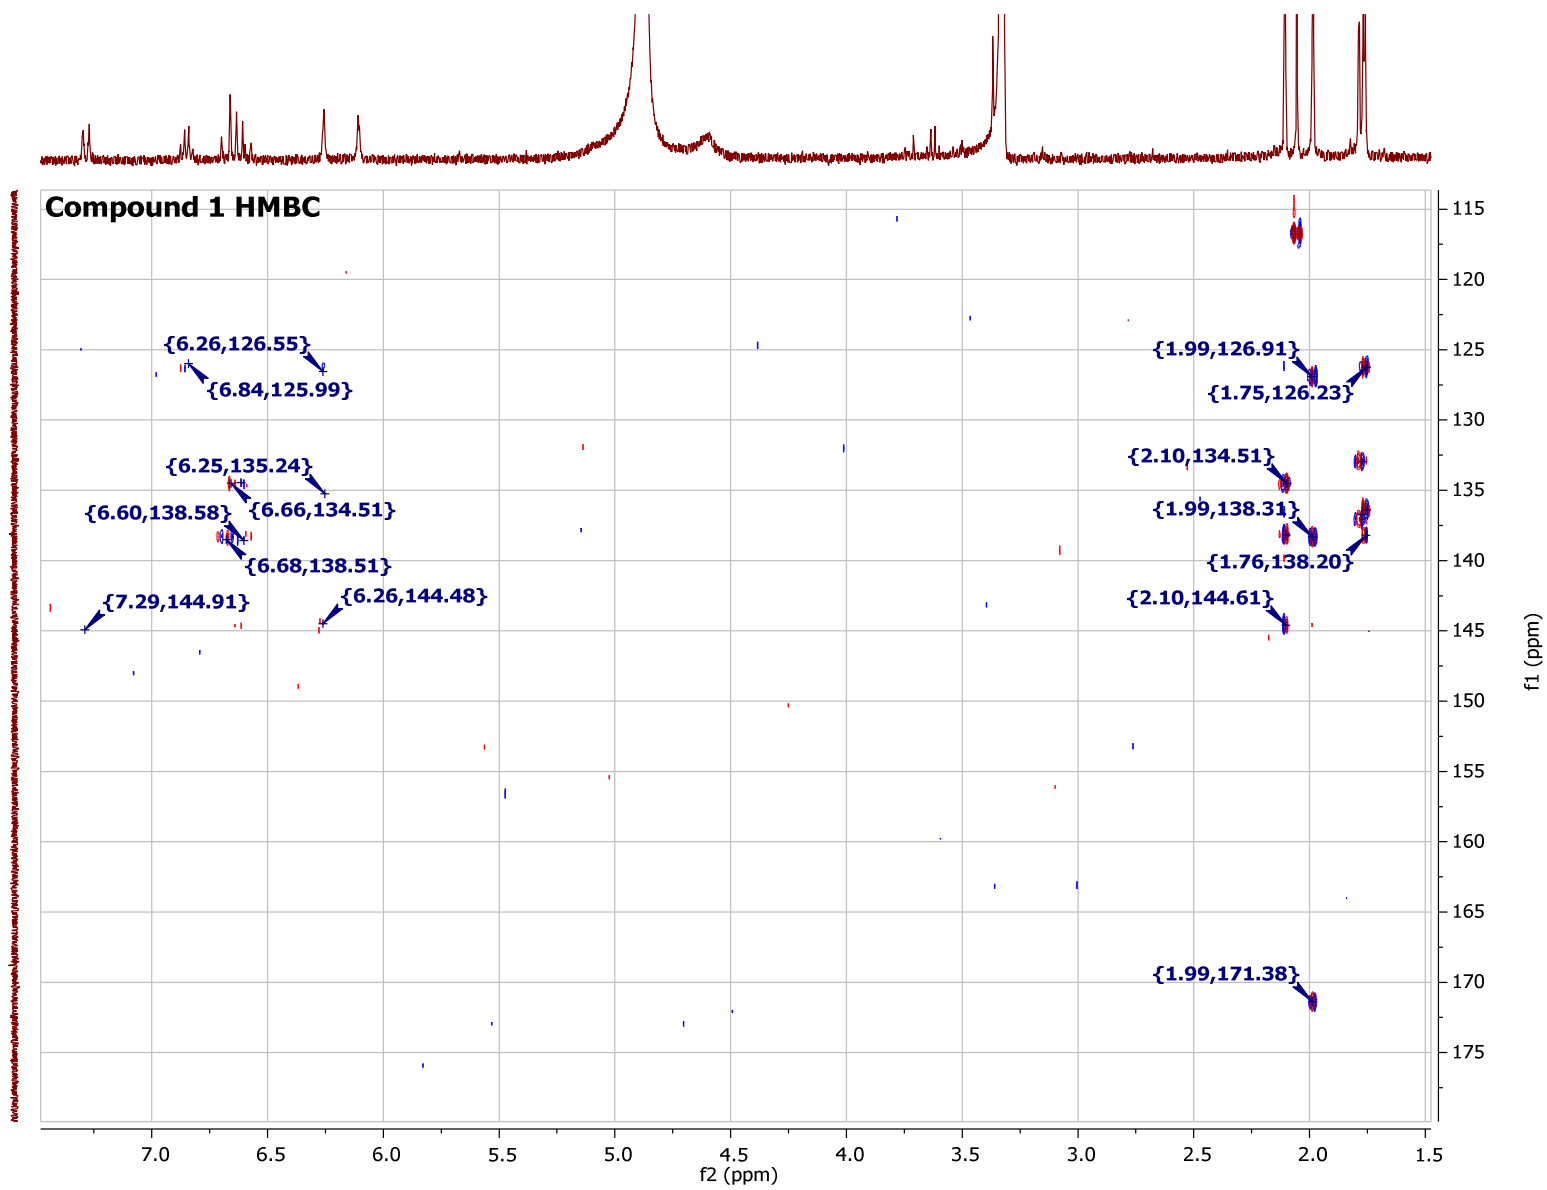



**Figure S6: HRESIMS of compound 2**

KH Ahammad Zaman ZS 3

SYNAPT G2-Si#NotSet

09:09:45

Synapt\_23192n\_02 24 (0.482)

1: TOF MS ES-

3.98e6

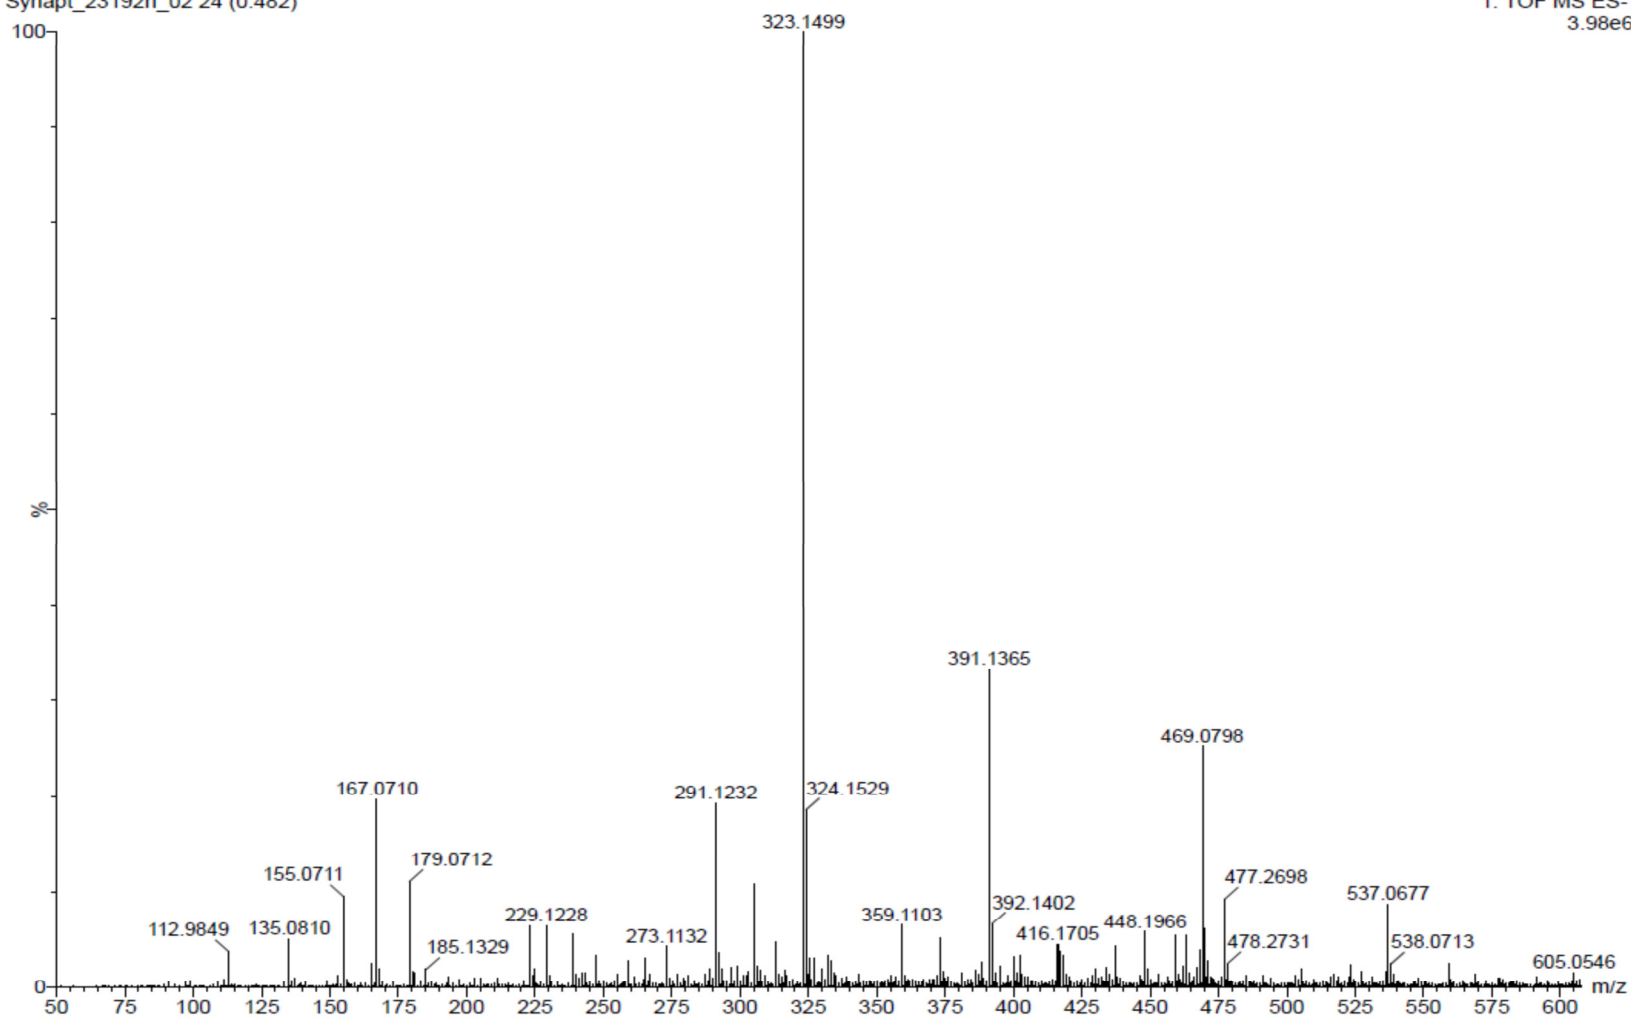

Figure S7:  $^1\text{H}$  NMR spectrum of compound 2 in  $\text{CD}_3\text{OD}$  (400MHz)

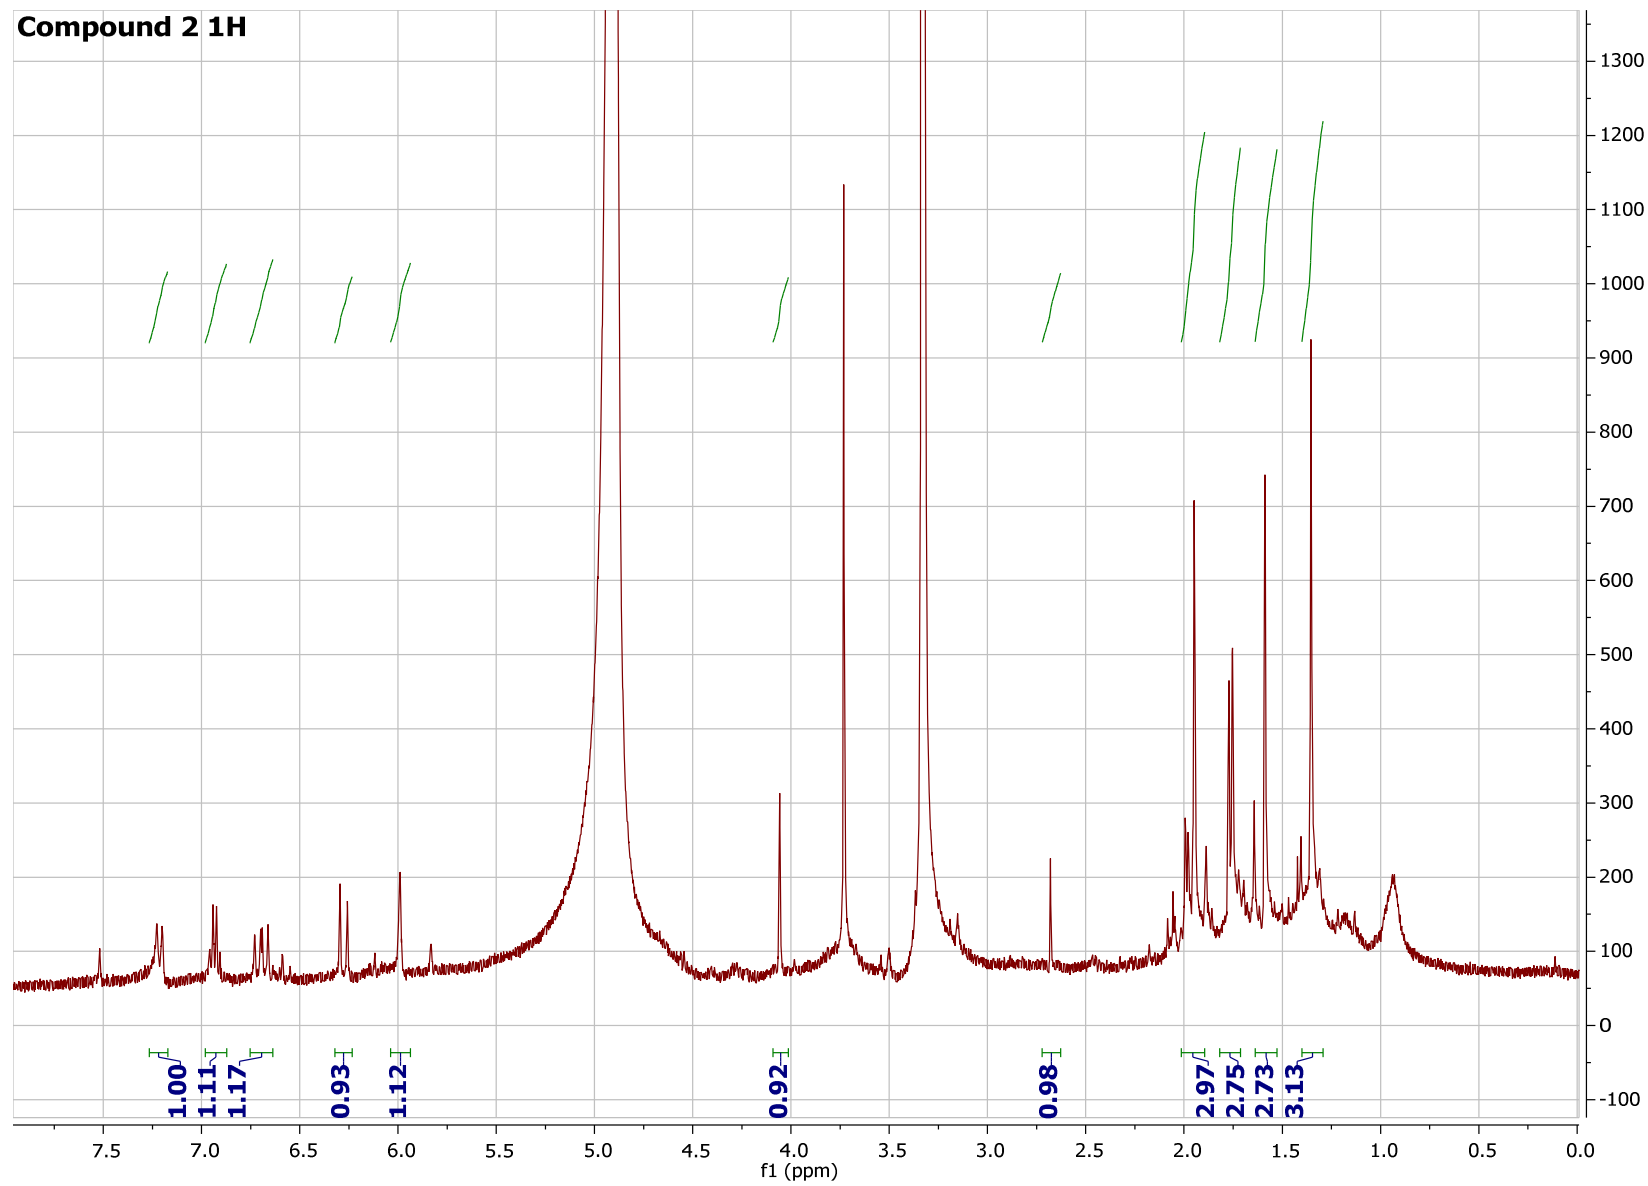

Figure S8: HSQC spectrum of compound 2 in CD<sub>3</sub>OD (400MHz)

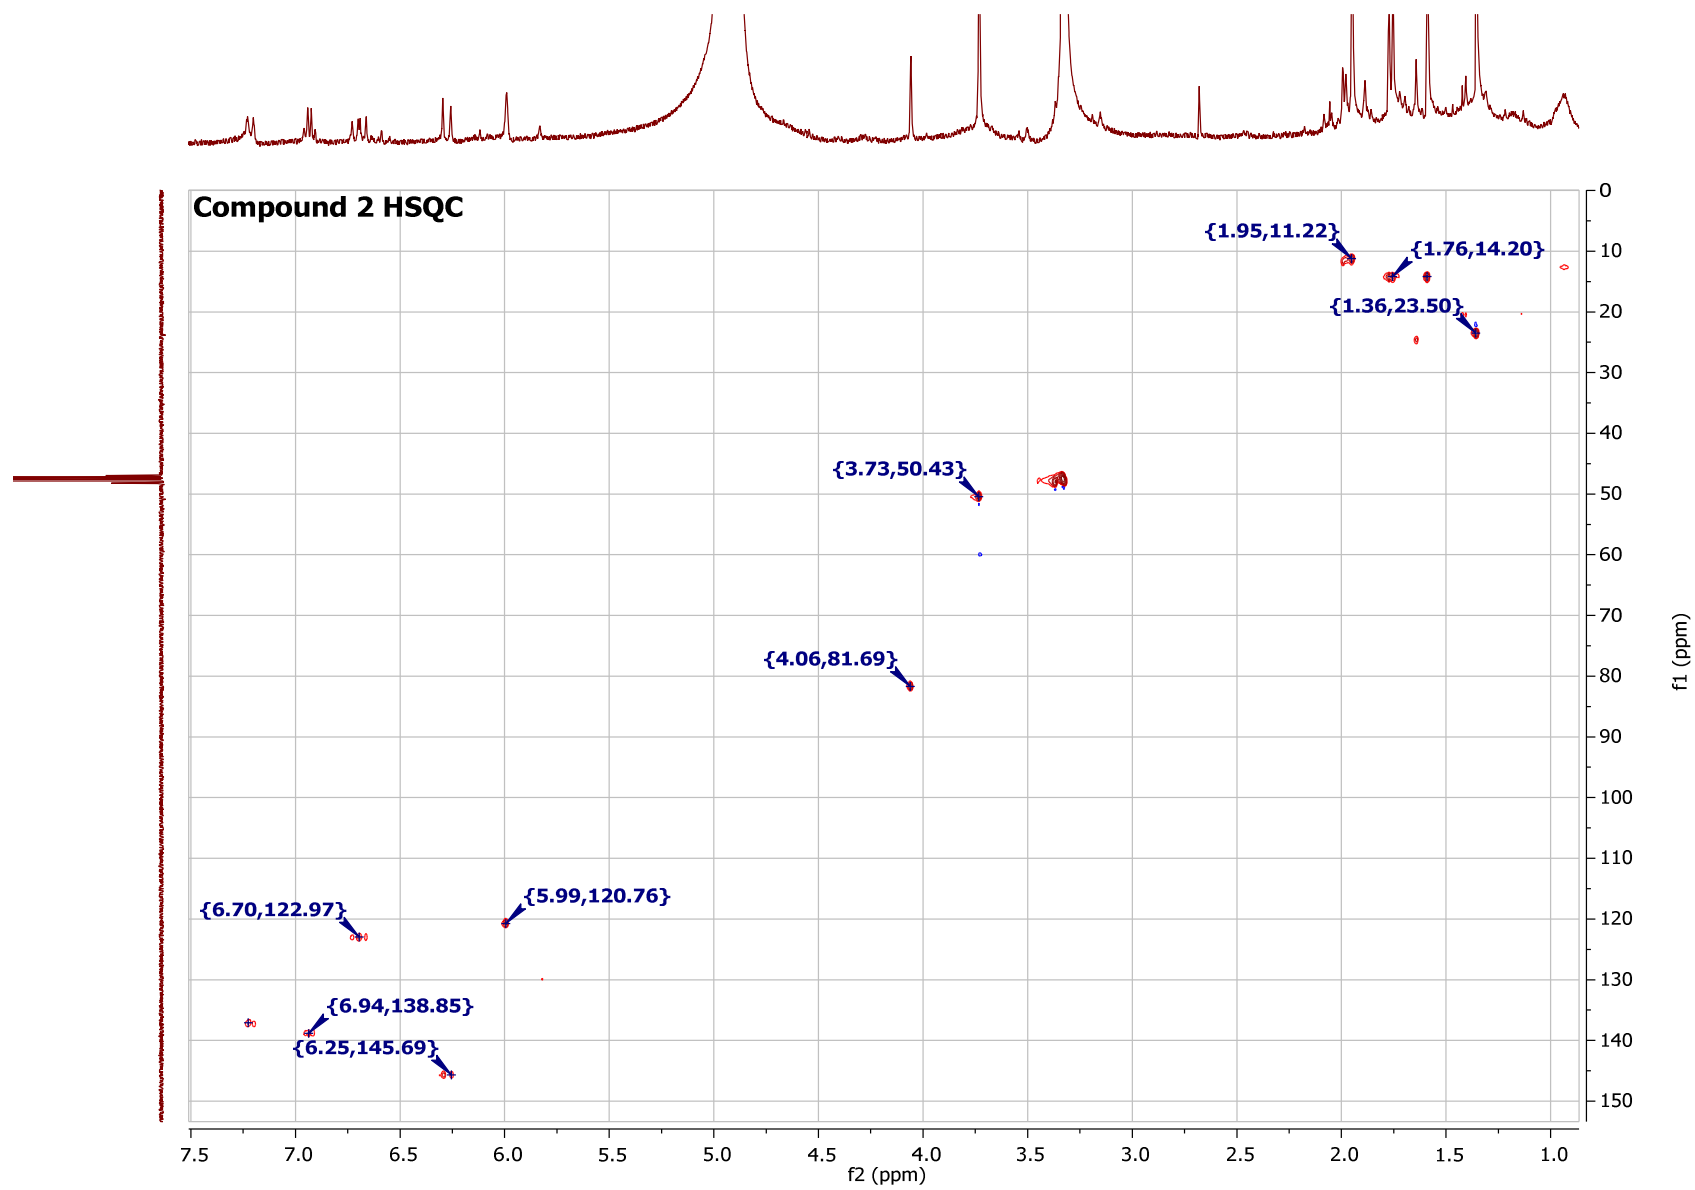

Figure S9: COSY spectrum of compound 2 in CD<sub>3</sub>OD (400MHz)

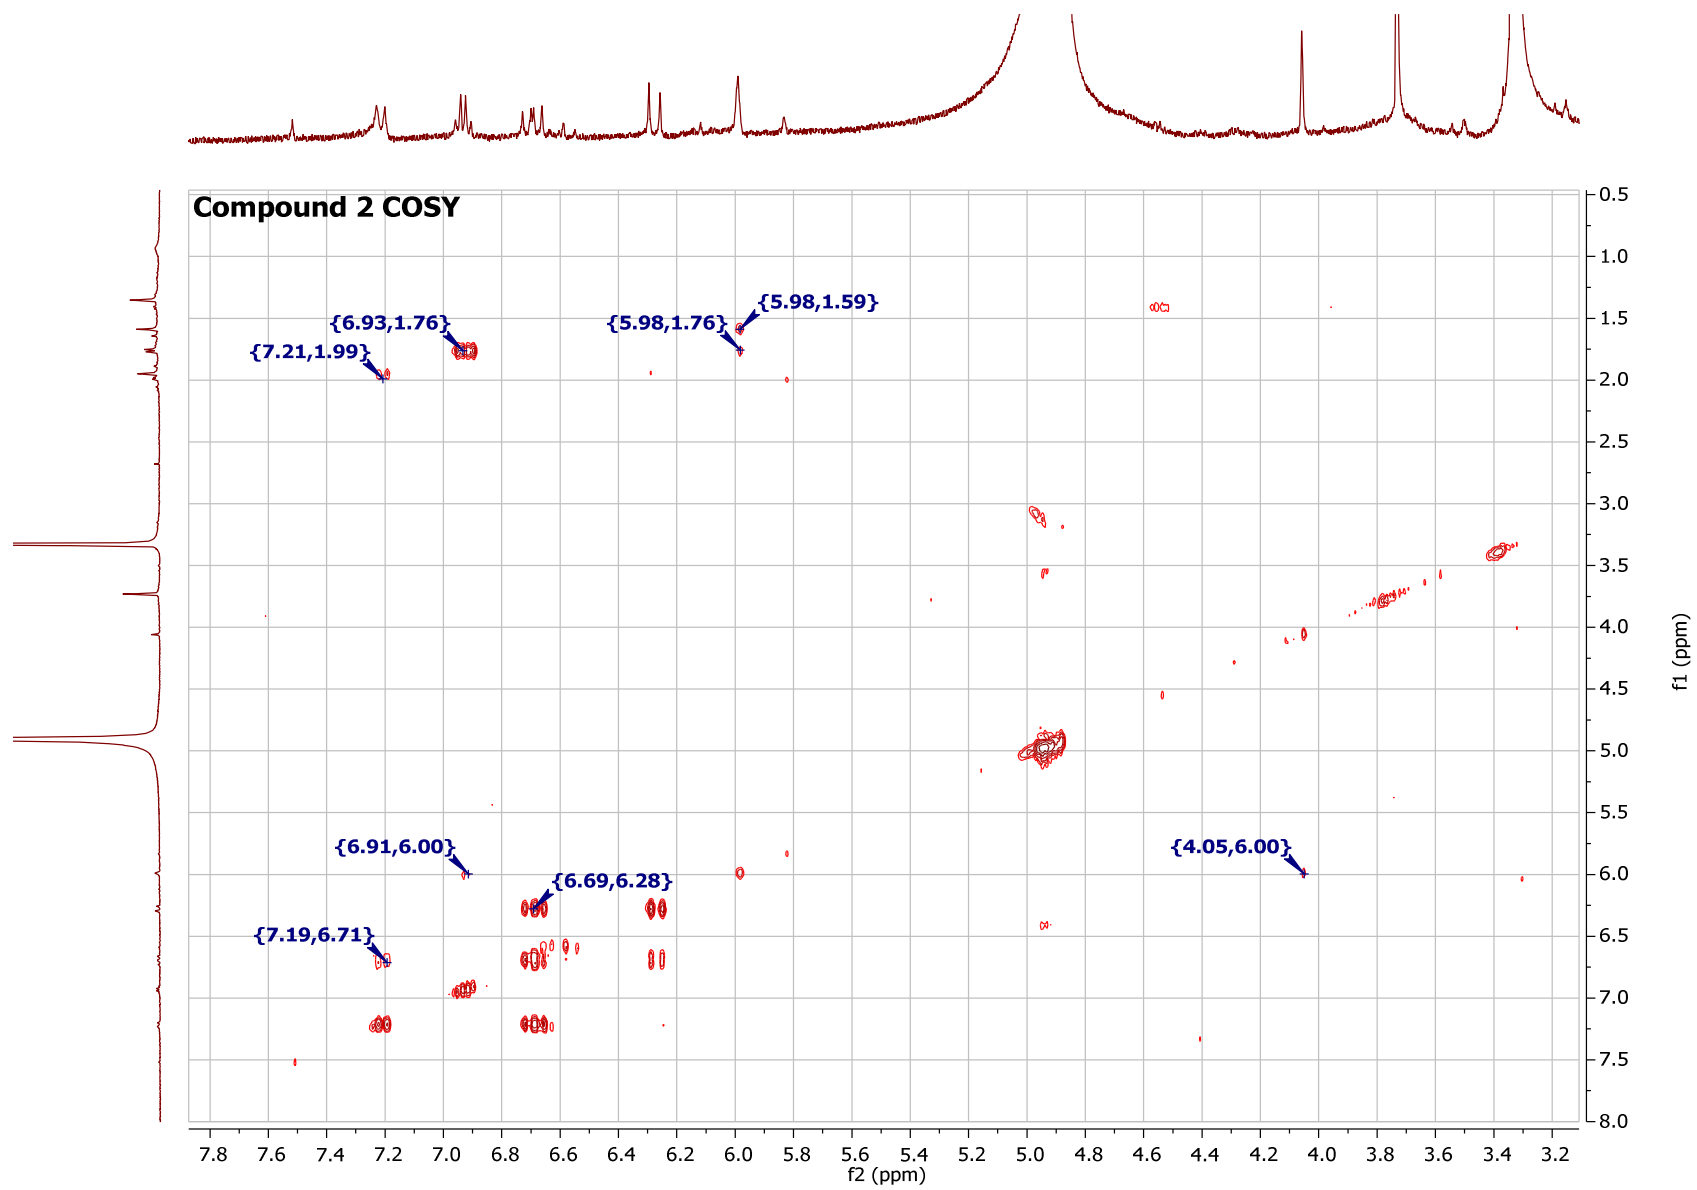

Figure S10: HMBC spectrum of compound 2 in CD<sub>3</sub>OD (400MHz)

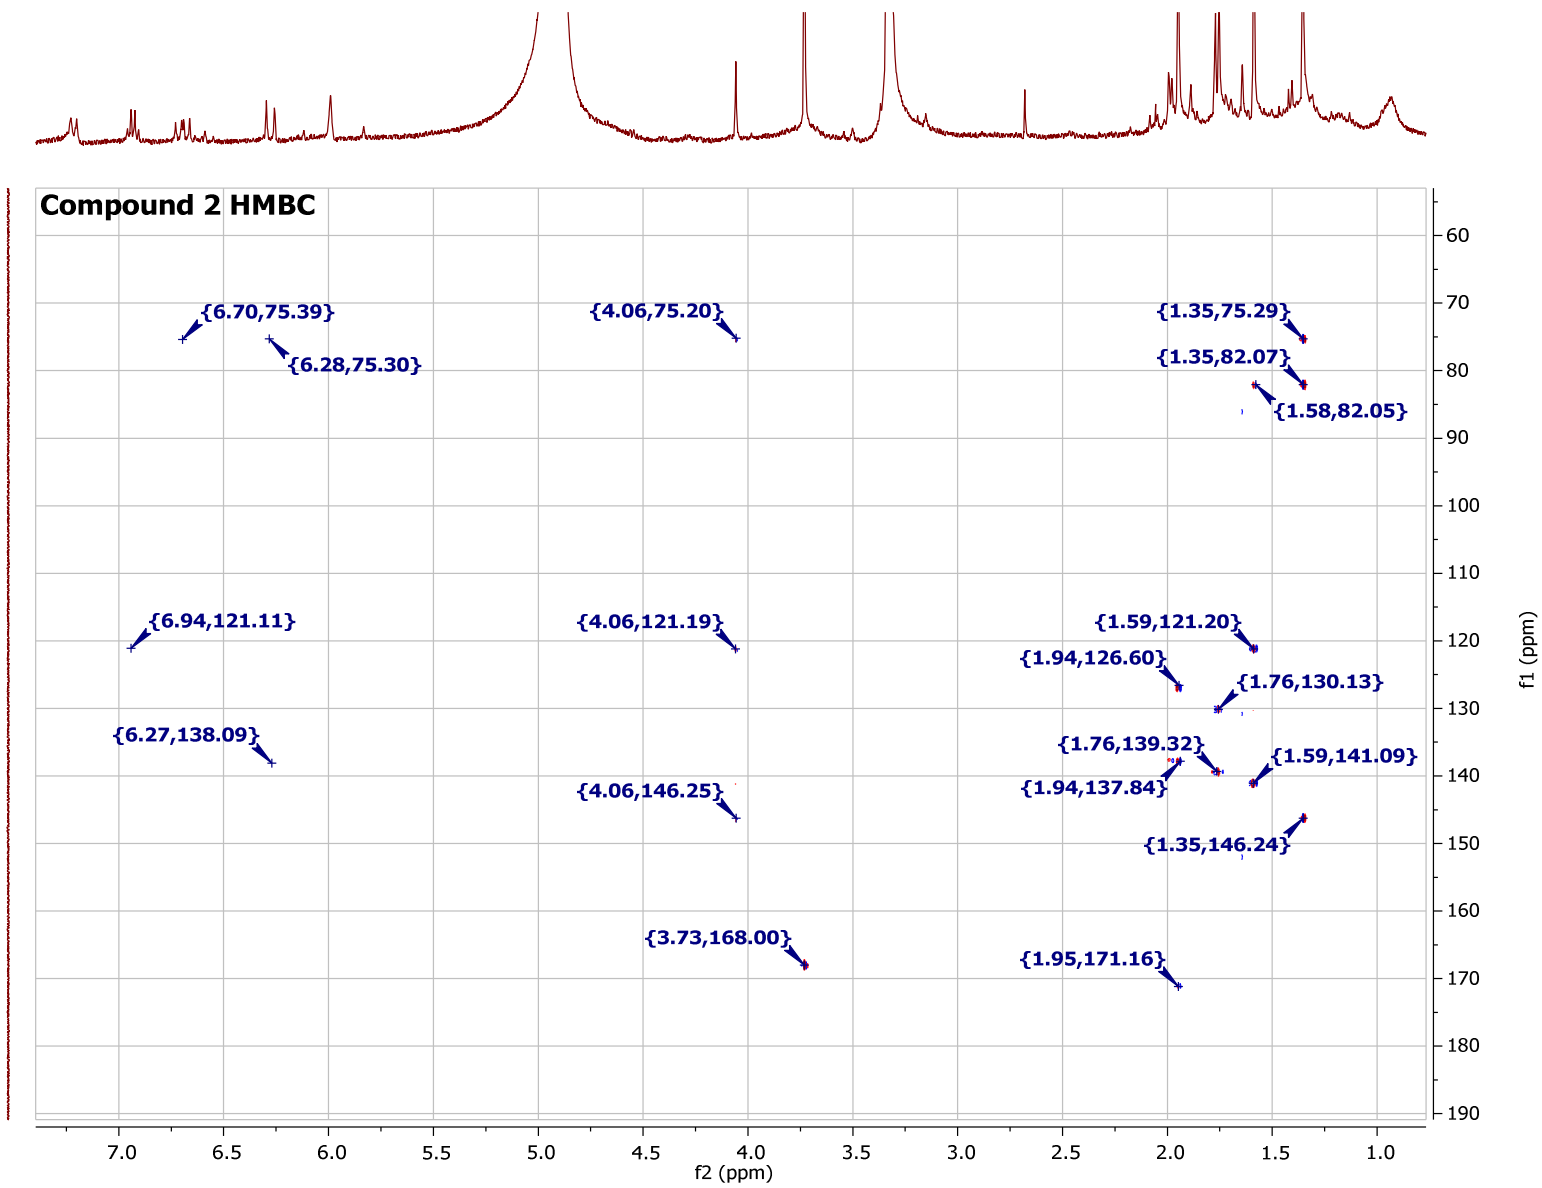

Figure S11: ROESY spectrum of compound 2 in CD<sub>3</sub>OD (400MHz)

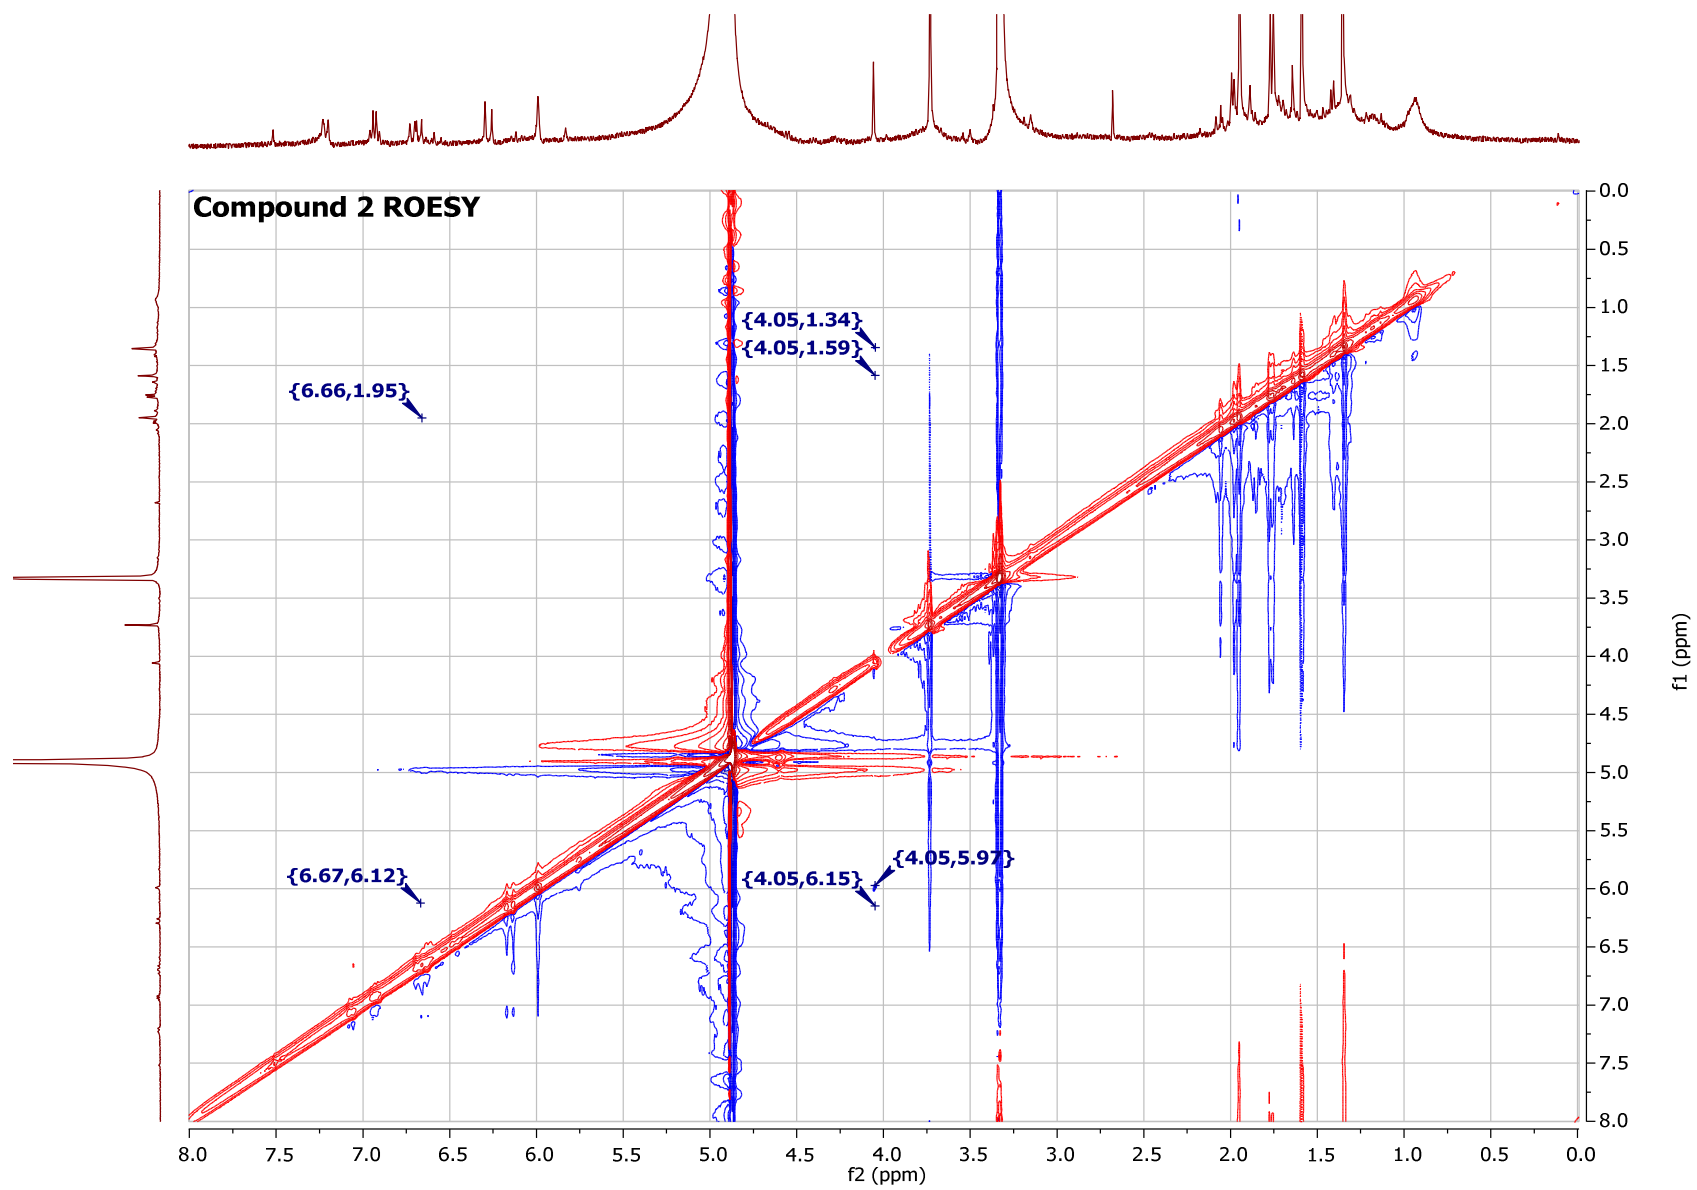

**Table S1: Calculated and experimental NMR of compound 2 in CD<sub>3</sub>OD (400MHz)**

| Atom numbers | Calculated NMR |      |        |      | Experimental NMR |      |
|--------------|----------------|------|--------|------|------------------|------|
|              | 2SS            |      | 2SR    |      | Original         |      |
|              | 13C            | 1H   | 13C    | 1H   | 13C              | 1H   |
| 1            | 169.98         |      | 170.02 |      | 171.1            |      |
| 2            | 126.42         |      | 126.13 |      | 126.6            |      |
| 3            | 142.96         | 7.43 | 143.10 | 7.35 | 137              | 7.23 |
| 4            | 124.93         | 6.94 | 122.99 | 6.88 | 138.8            | 6.7  |
| 5            | 156.15         | 6.48 | 151.26 | 6.23 | 145.7            | 6.25 |
| 6            | 79.77          |      | 79.20  |      | 75.2             |      |
| 7            | 86.24          | 4.07 | 84.93  | 4.06 | 81.7             | 4.06 |
| 8            | 141.57         |      | 143.41 |      | 141              |      |
| 9            | 131.45         | 6.24 | 130.72 | 6.18 | 120.7            | 5.99 |
| 10           | 128.65         |      | 128.28 |      | 130.1            |      |
| 11           | 154.45         | 6.44 | 154.99 | 6.27 | 138.8            | 6.94 |
| 12           | 16.78          | 2.45 | 16.67  | 2.42 | 14.2             | 1.76 |
| 13           | 12.88          | 1.92 | 12.96  | 1.90 | 11.2             | 1.95 |
| 15           | 23.26          | 1.17 | 27.79  | 1.41 | 23.5             | 1.36 |
| 16           | 13.51          | 1.85 | 12.69  | 1.73 | 14.1             | 1.59 |
| 17           | 169.52         |      | 169.54 |      | 168              |      |
| 19           | 51.60          | 3.63 | 51.45  | 3.60 | 50.4             | 3.73 |

**Figure S12: HRESIMS of compound 3**

KH Ahammad Zaman ZS 4

SYNAPT G2-Si#NotSet  
16:29:38  
1: TOF MS ES-  
2.28e5

Synapt\_23193n 36 (0.725)

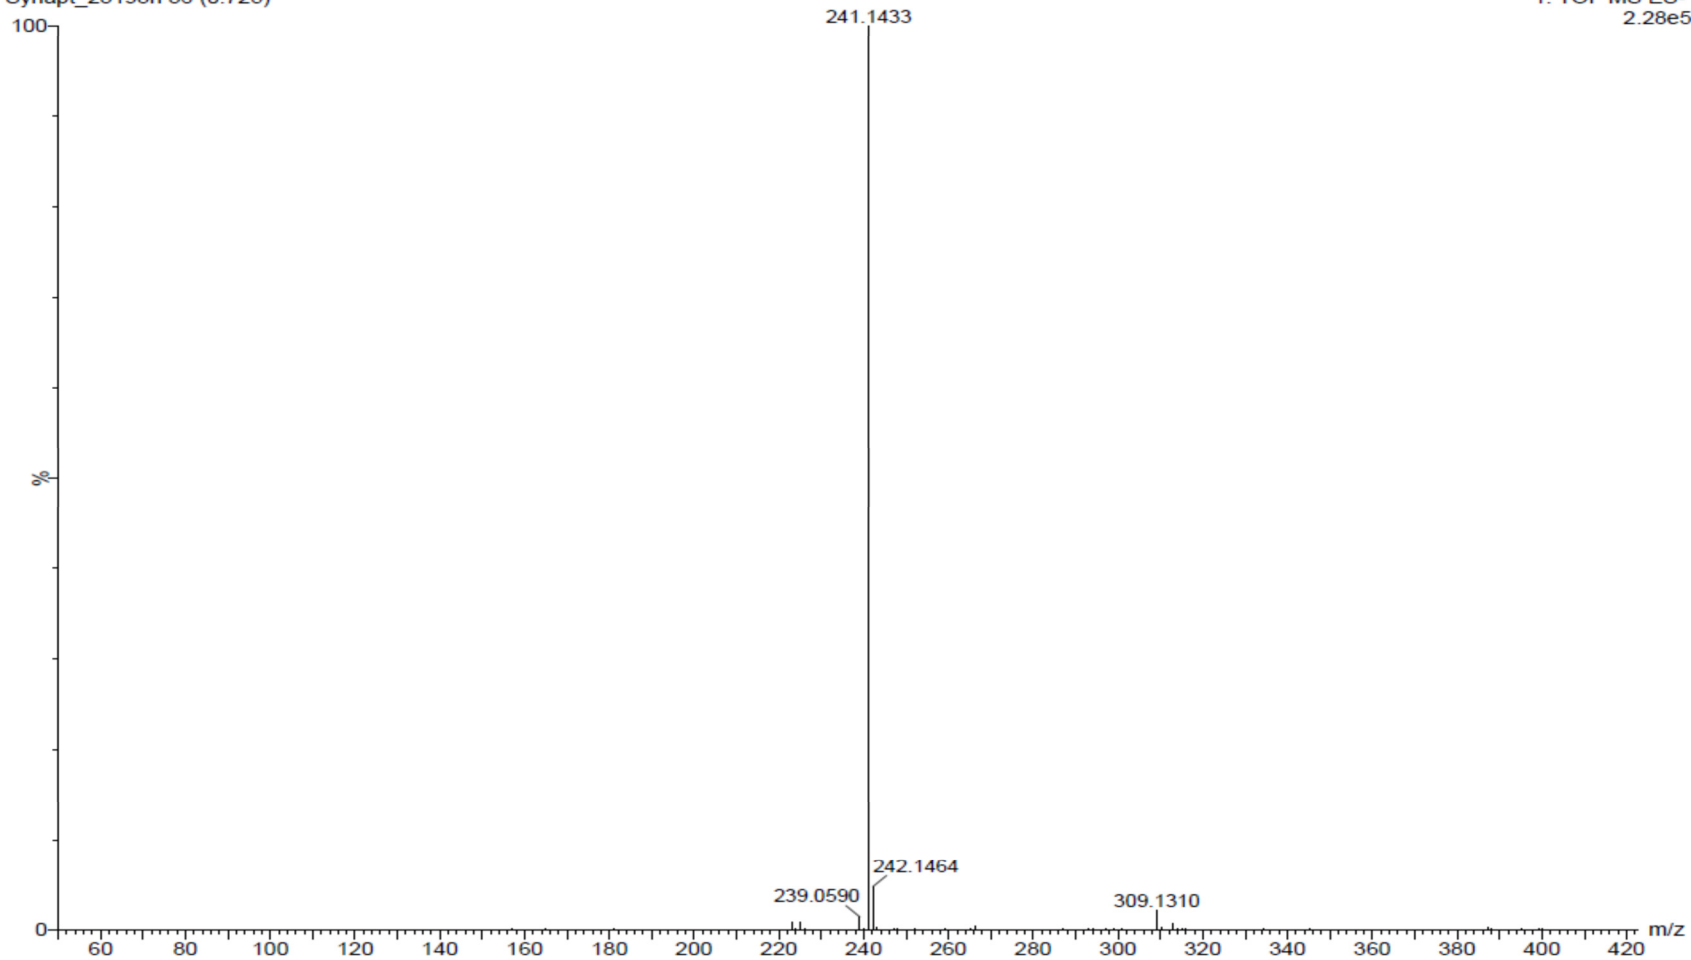



Figure S13:  $^1\text{H}$  NMR spectrum of compound 3 in  $\text{CD}_3\text{OD}$  (400MHz)

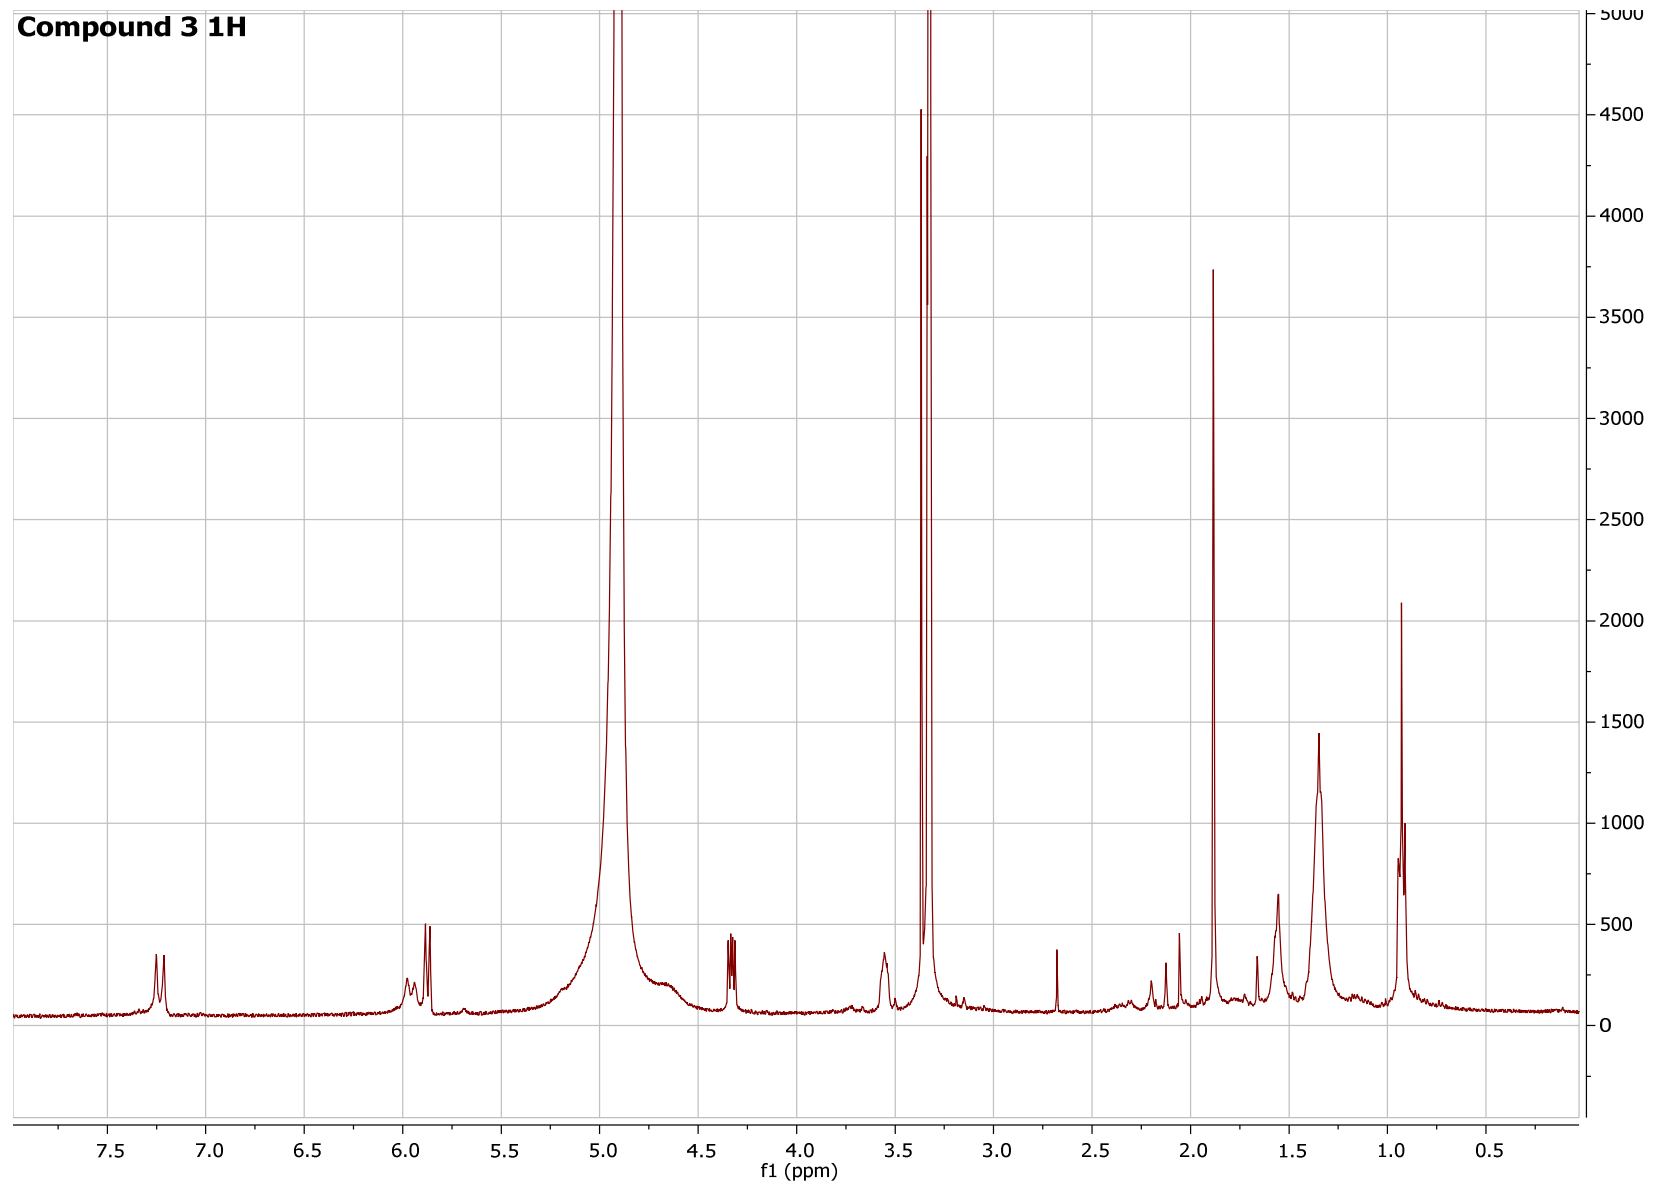

Figure S14: HSQC spectrum of compound 3 in CD<sub>3</sub>OD (400MHz)

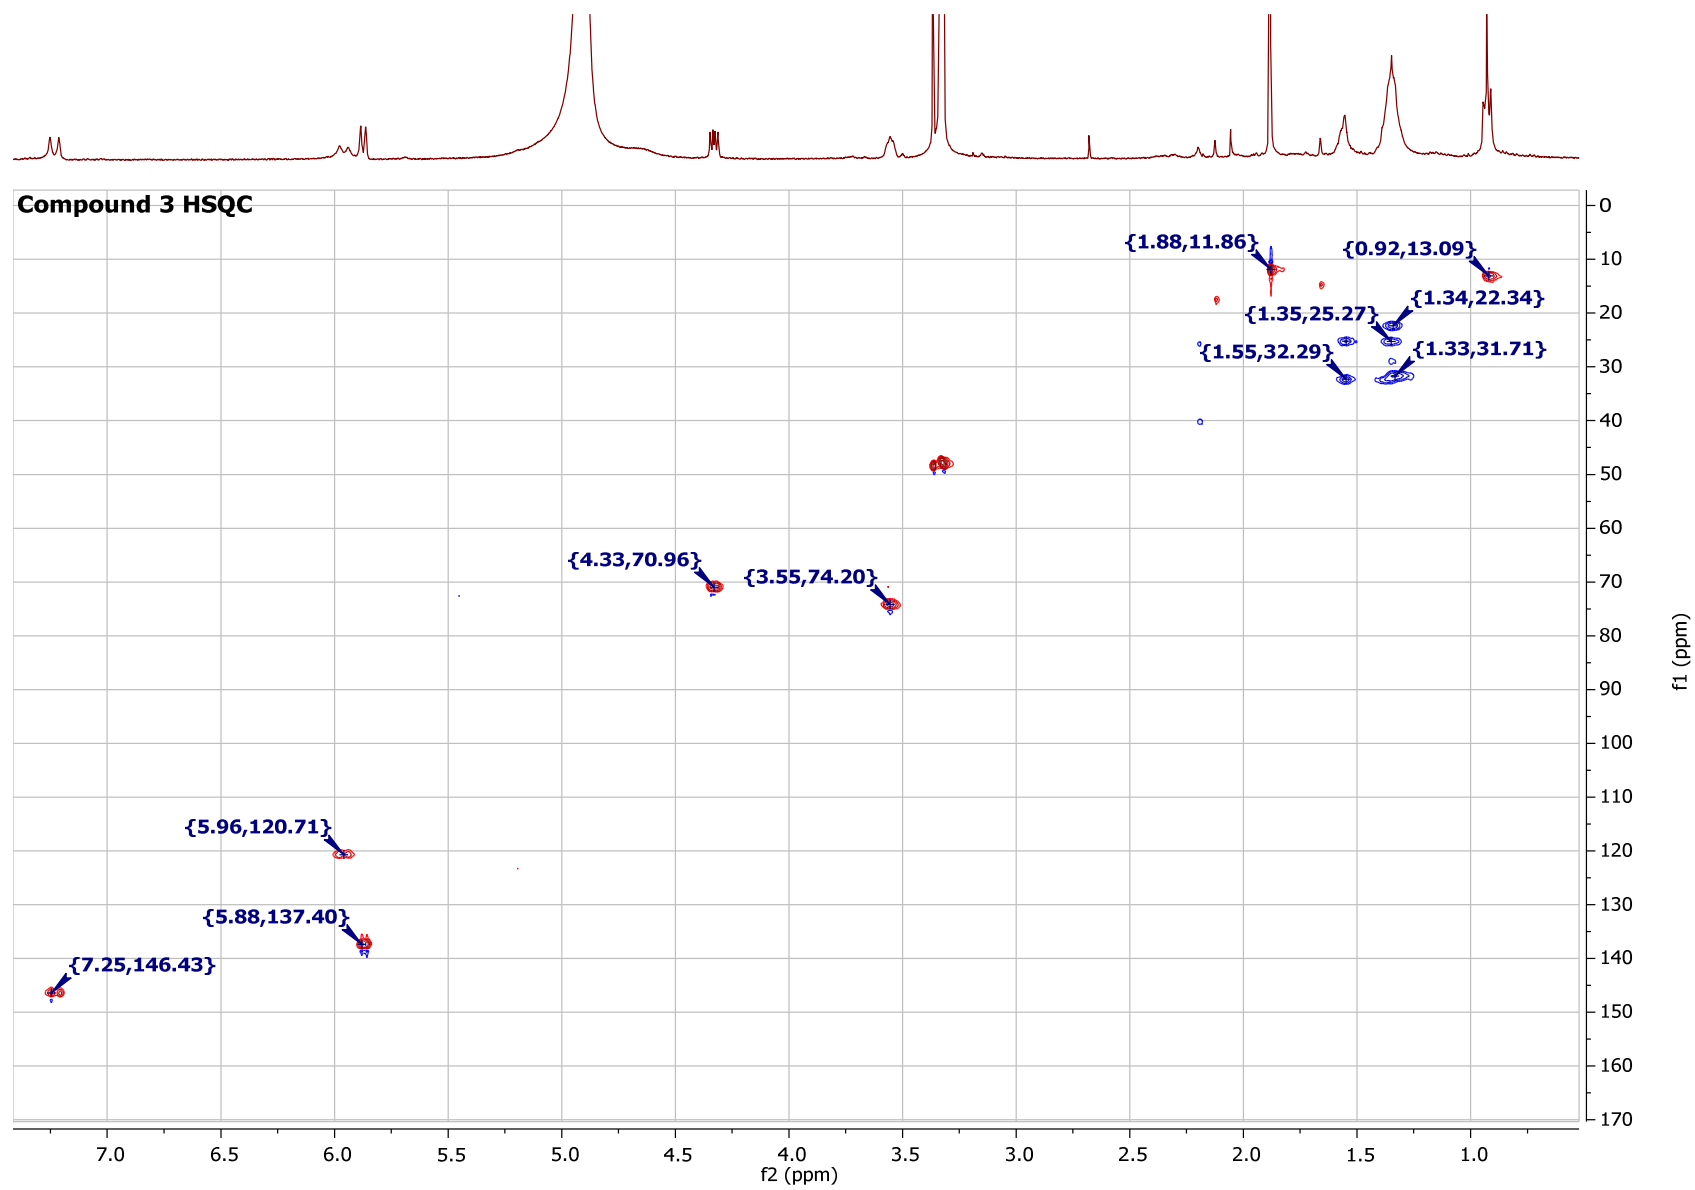

Figure S15: COSY spectrum of compound 3 in CD<sub>3</sub>OD (400MHz)

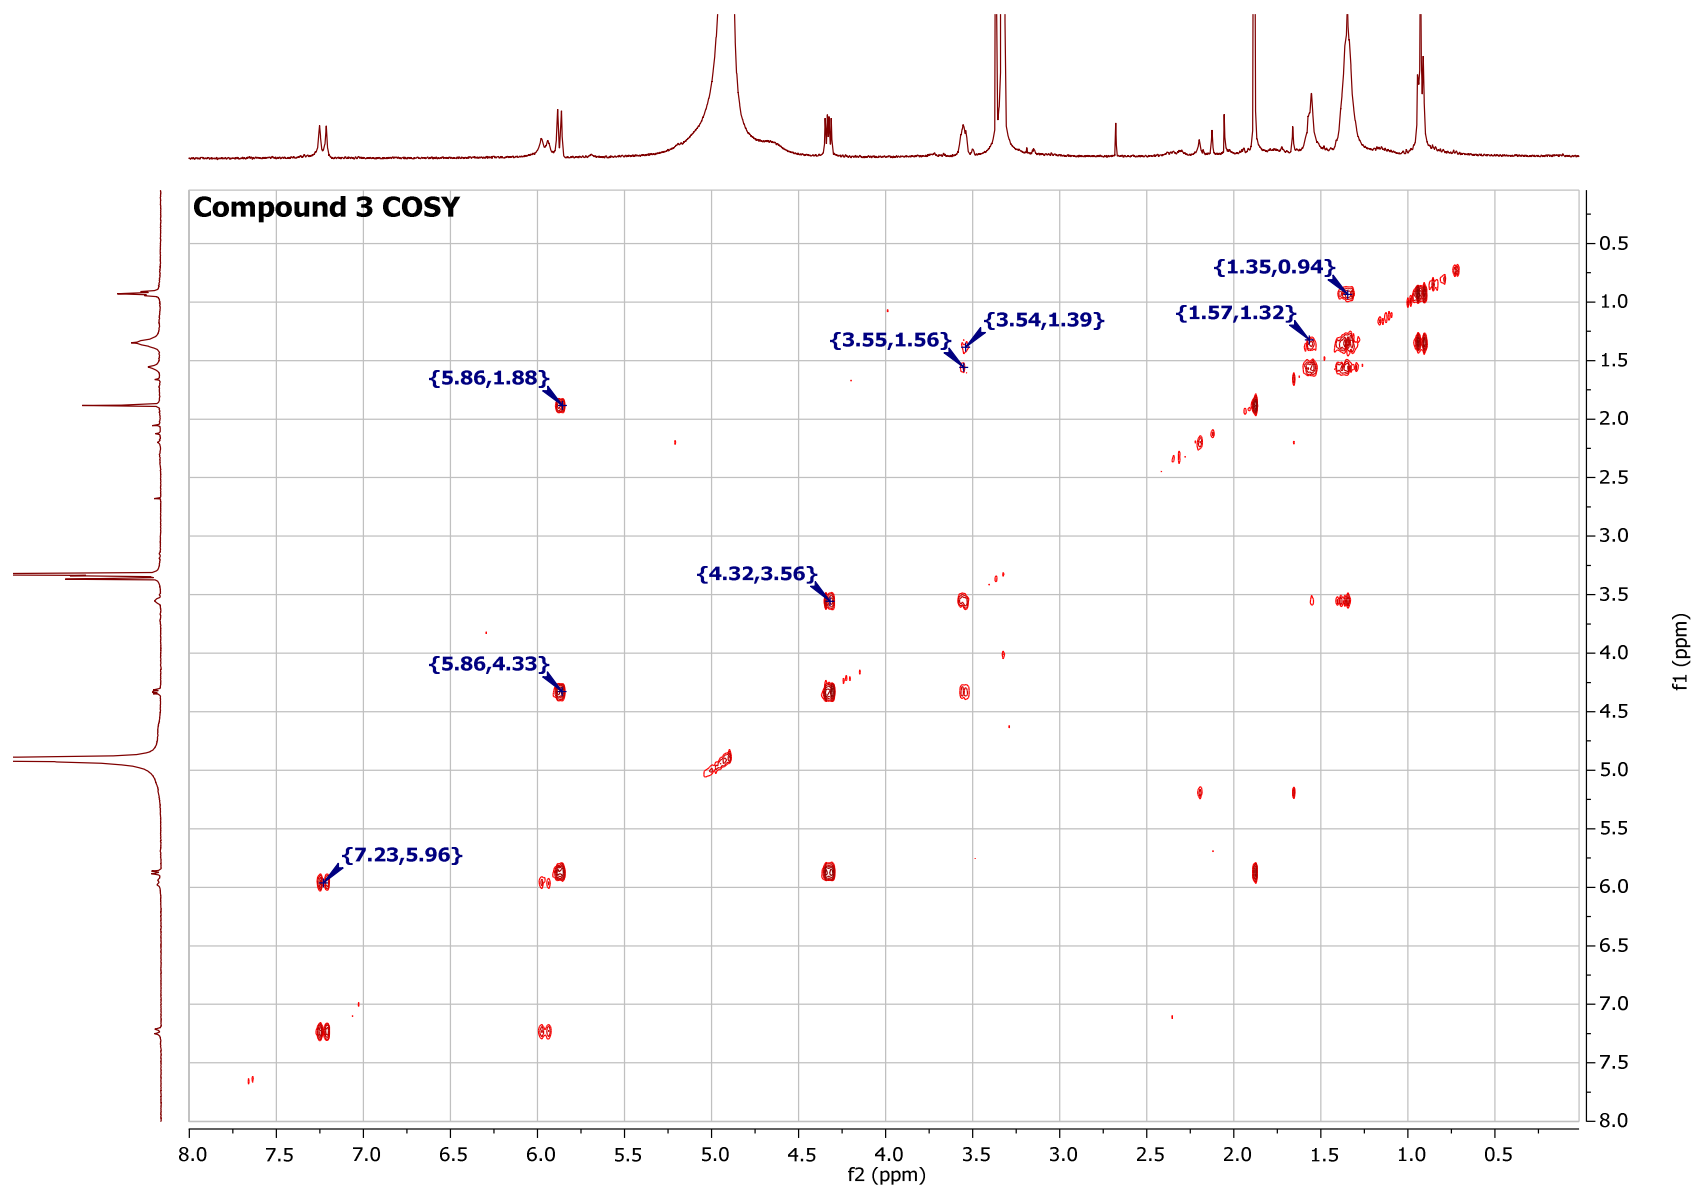

Figure S16: HMBC spectrum of compound 3 in CD<sub>3</sub>OD (400MHz)

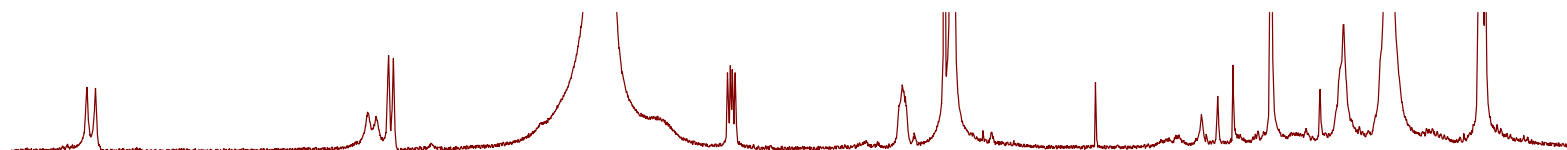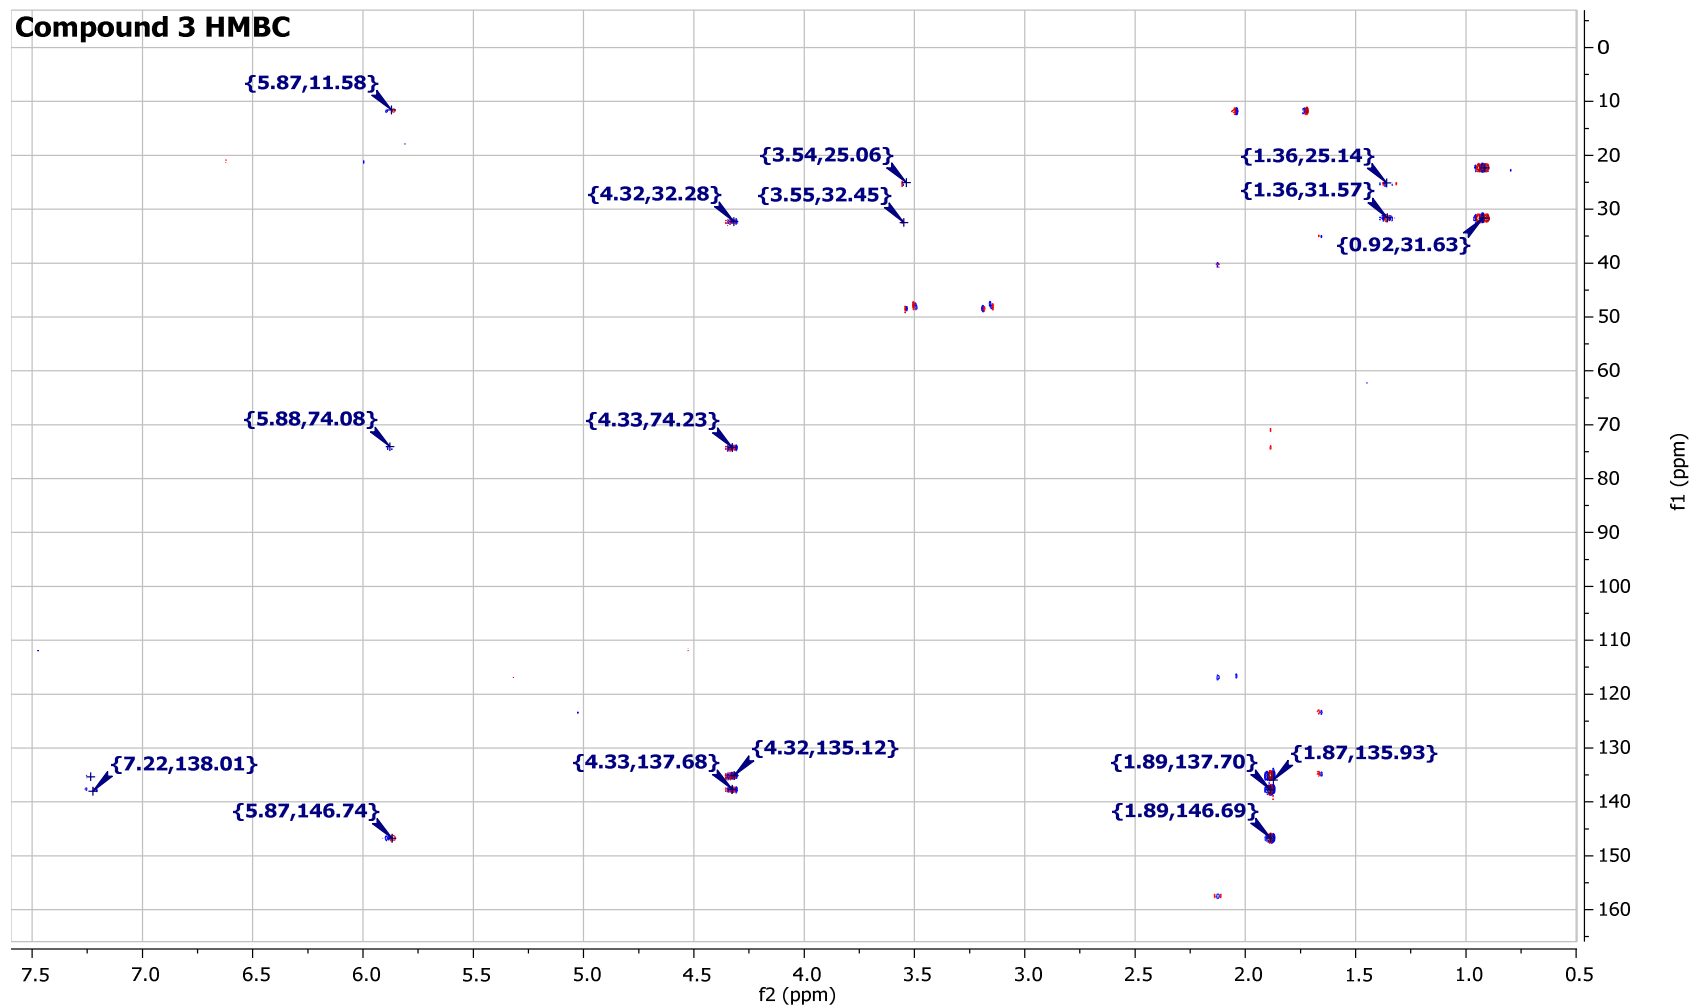

Figure S17: ROESY spectrum of compound 3 in CD<sub>3</sub>OD (400MHz)

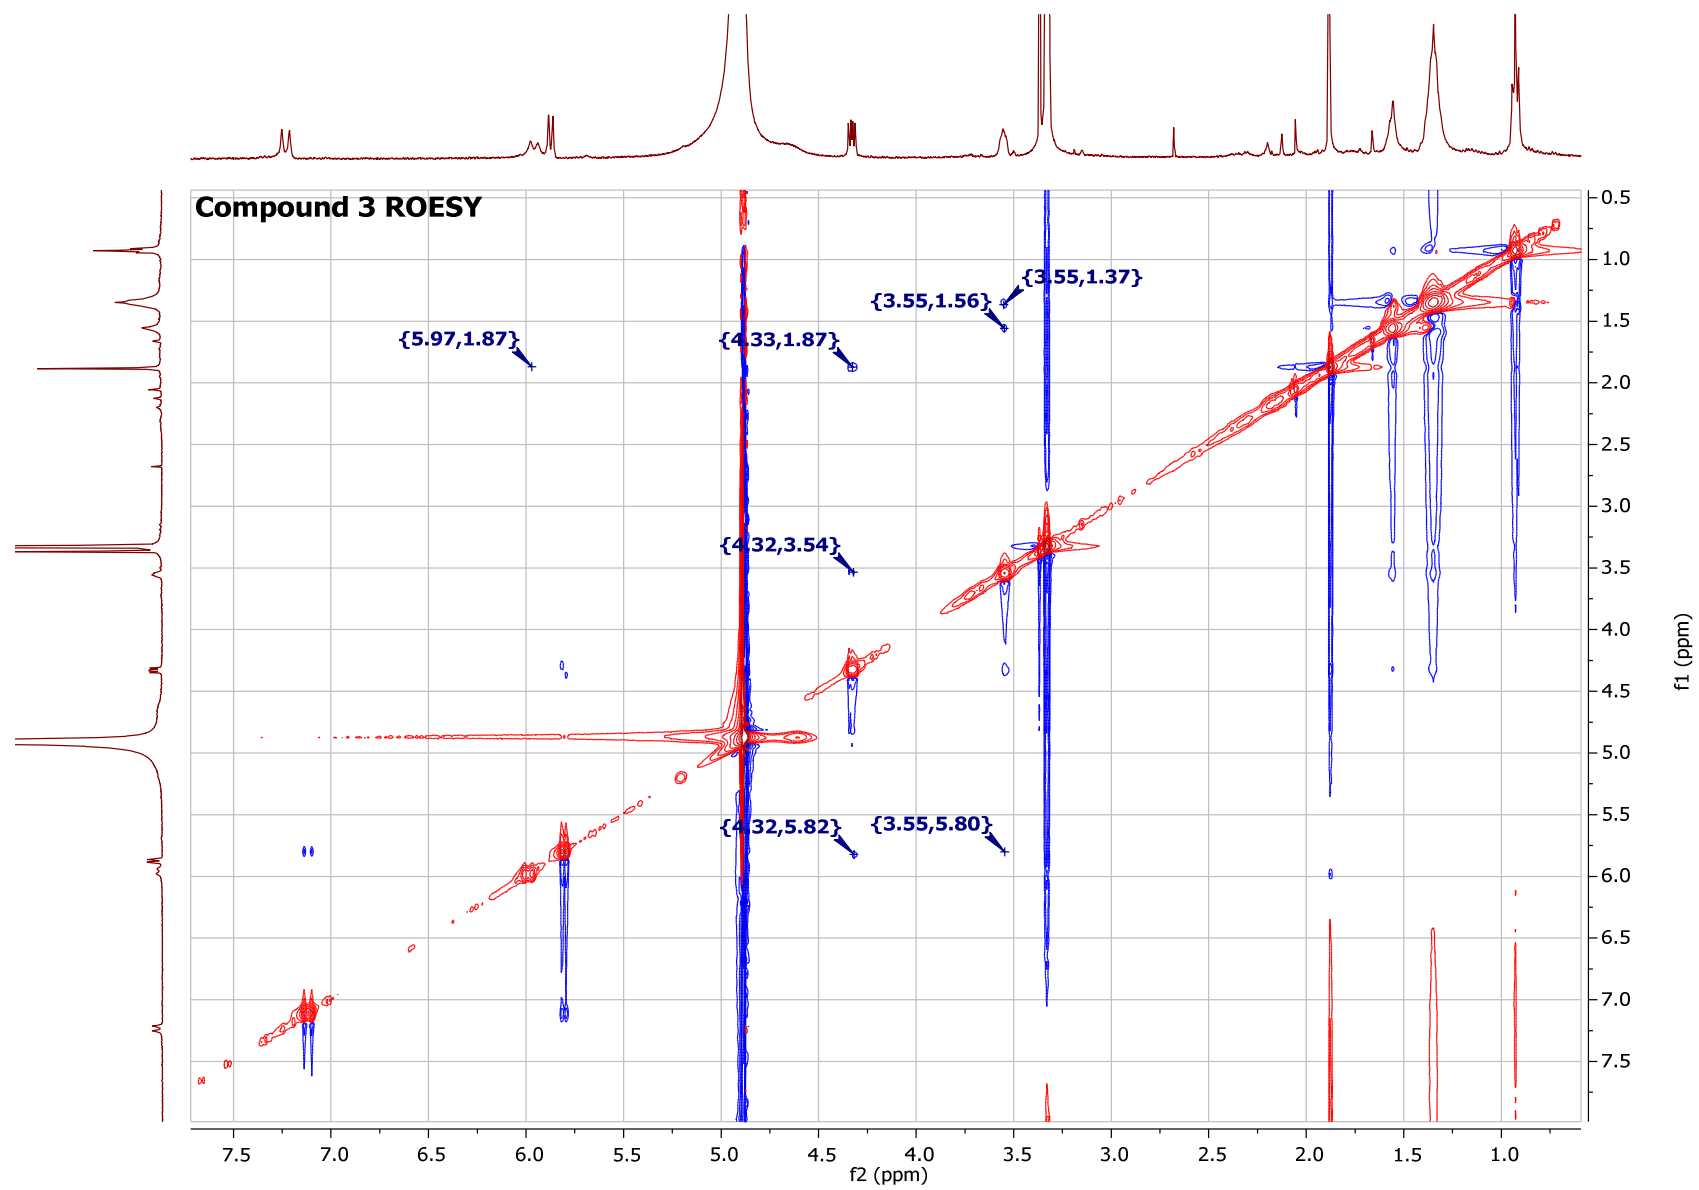

**Figure S18: HRESIMS of compound 4**

KH Ahammad Zaman ZS 4

SYNAPTG2-Si#NotSet  
16:29:38  
1: TOF MS ES-  
2.28e5

Synapt\_23193n 36 (0.725)

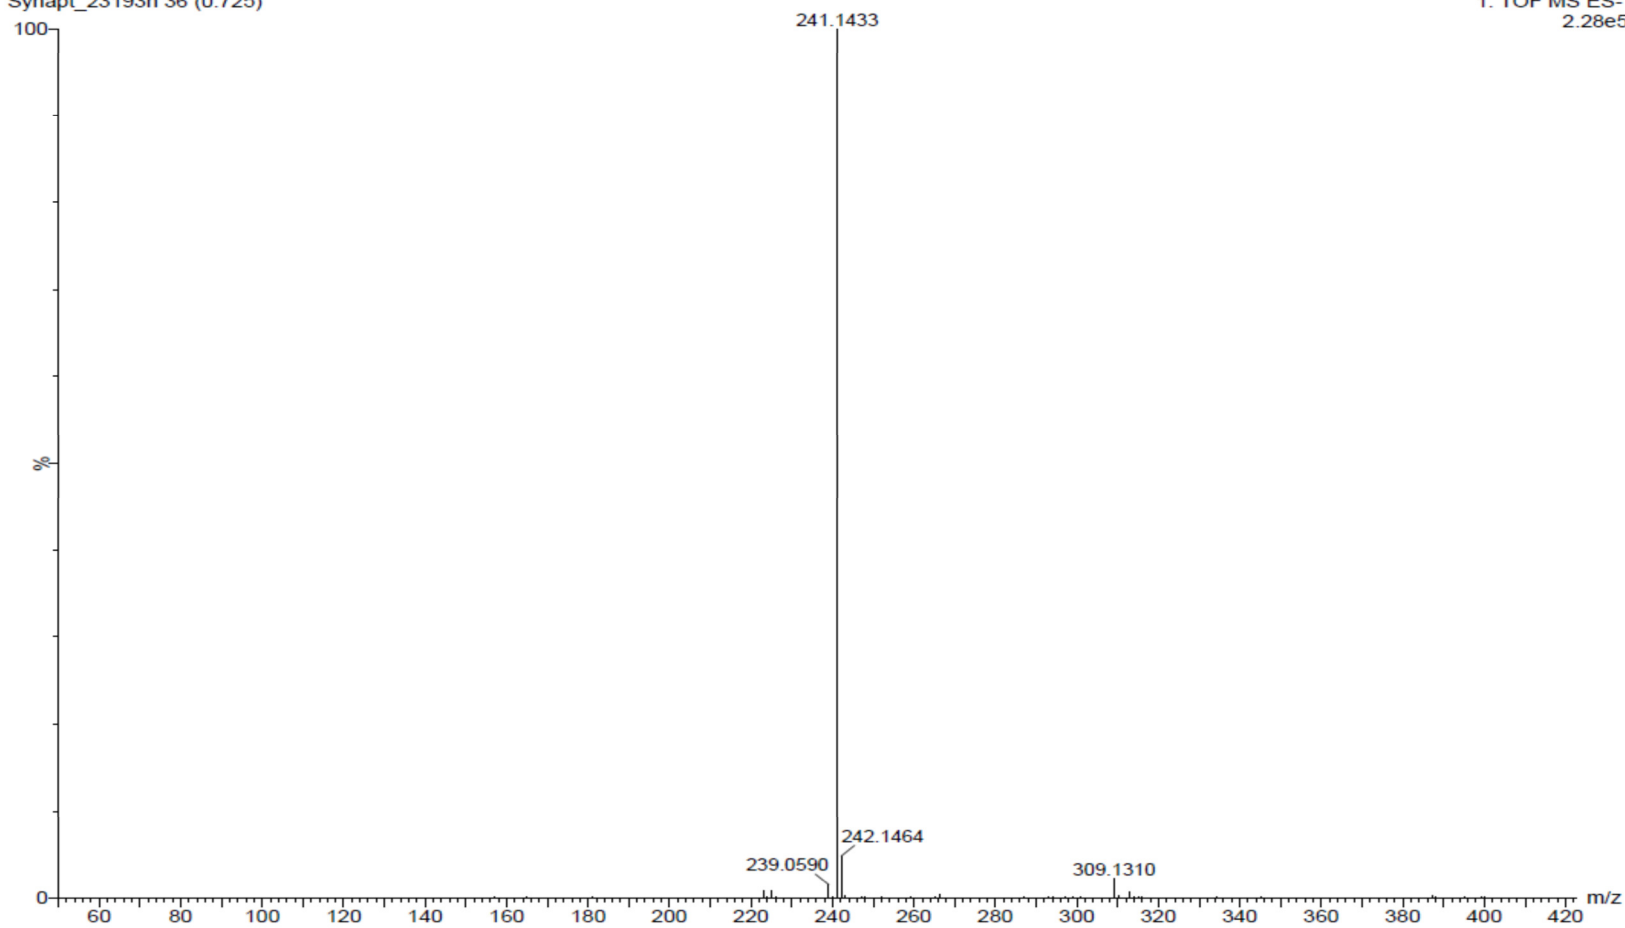

Figure S19:  $^1\text{H}$  NMR spectrum of compound 4 in  $\text{CD}_3\text{OD}$  (400MHz)

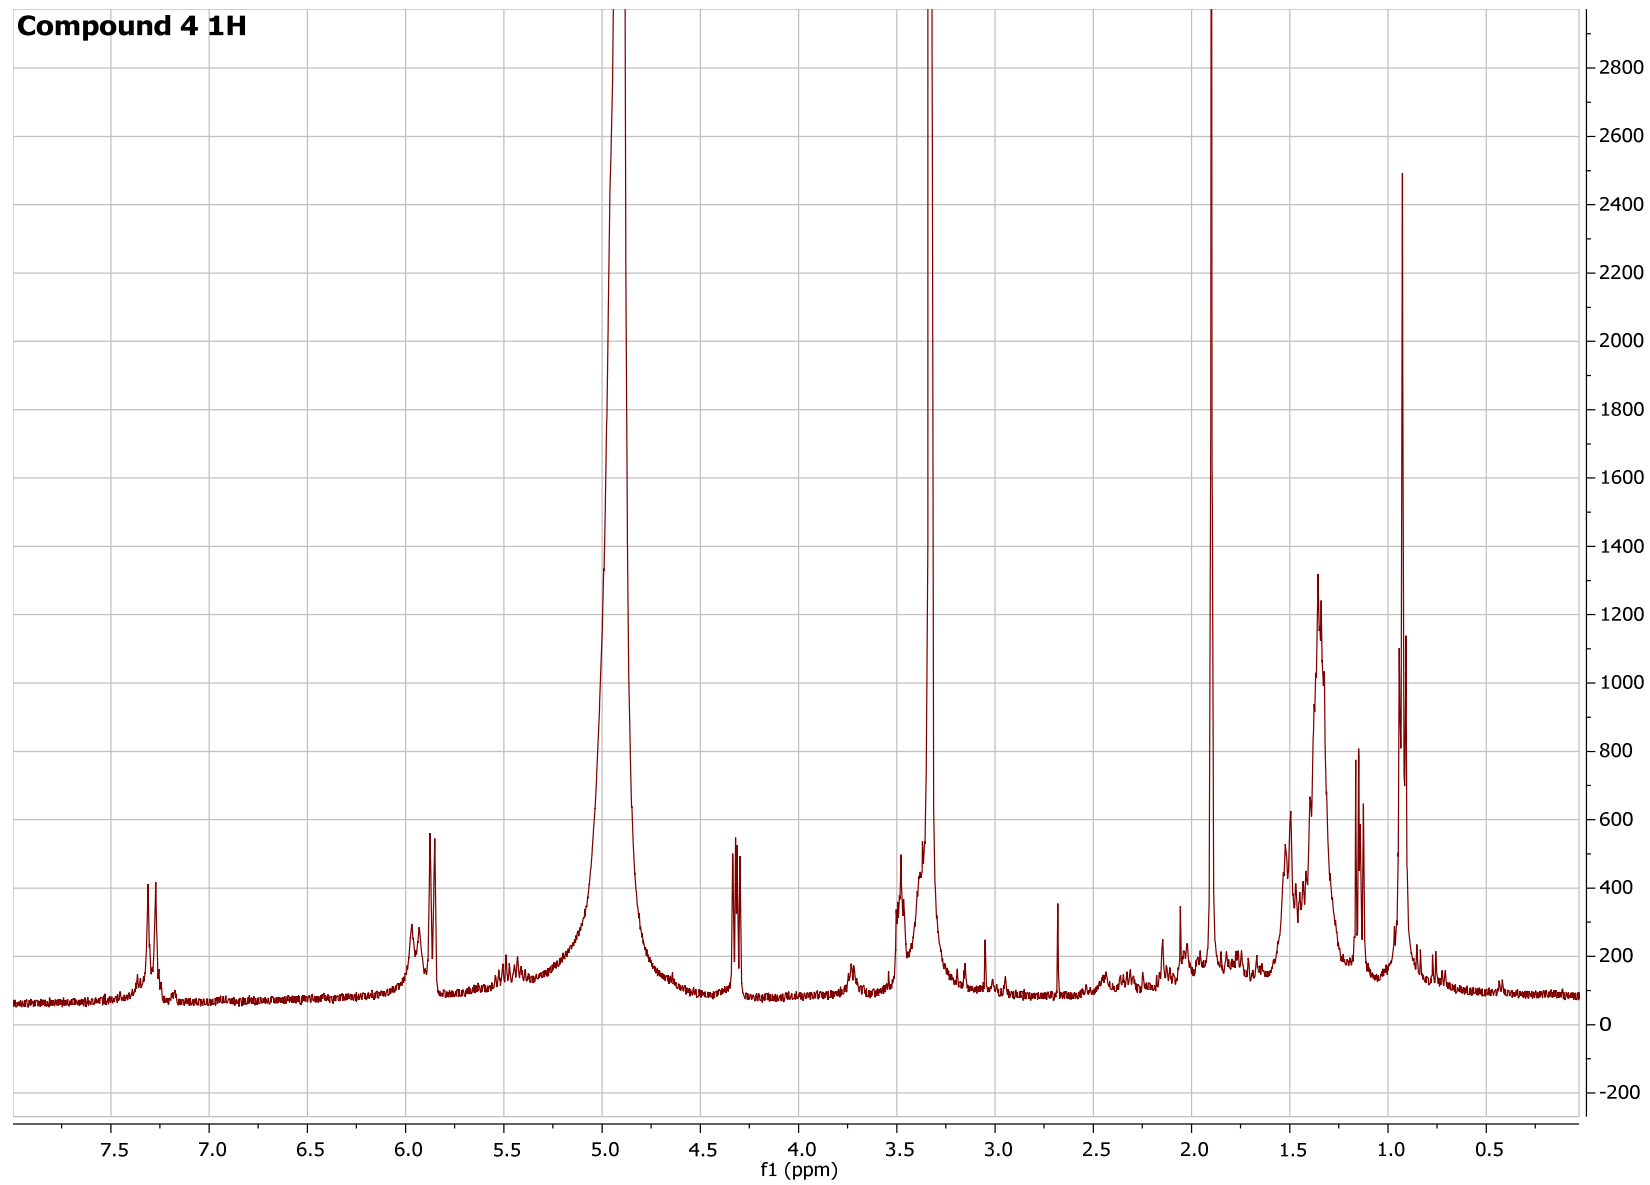

Figure S20: HSQC spectrum of compound 4 in CD<sub>3</sub>OD (400MHz)

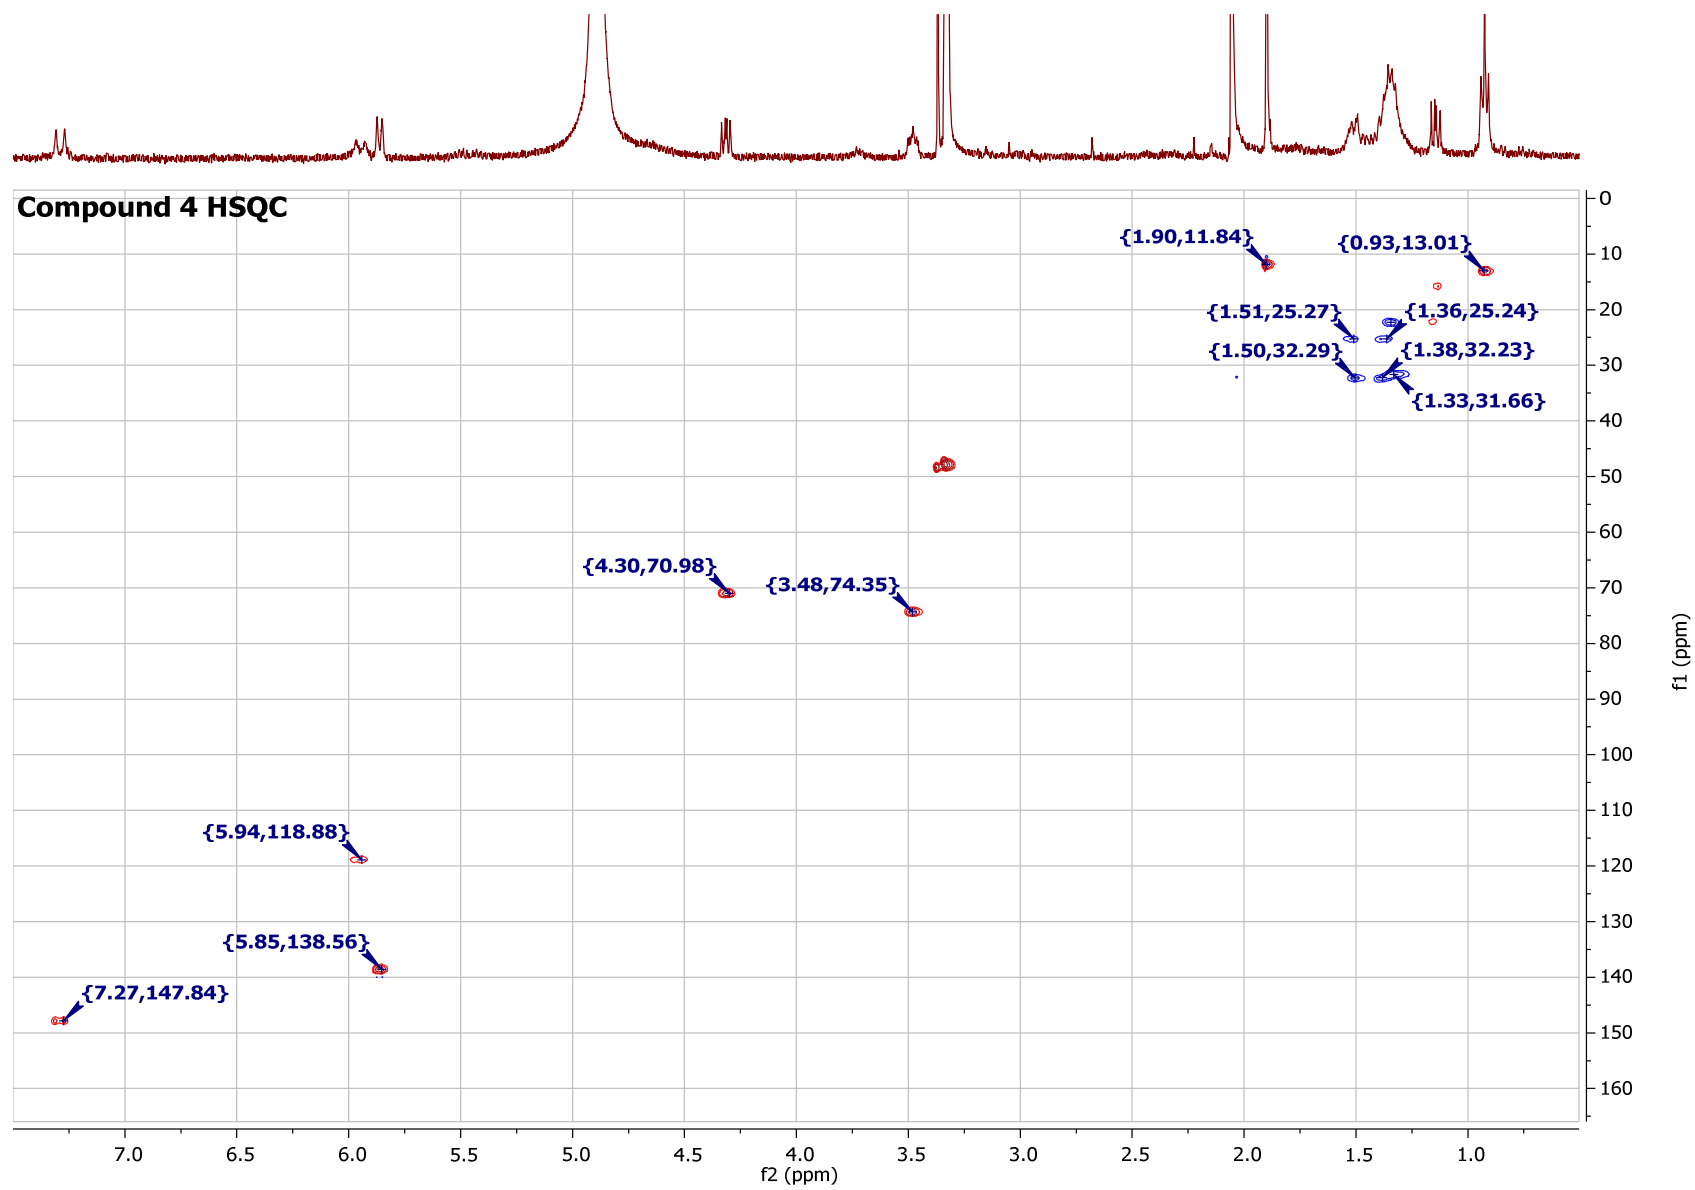



Figure S21: COSY spectrum of compound 4 in CD<sub>3</sub>OD (400MHz)

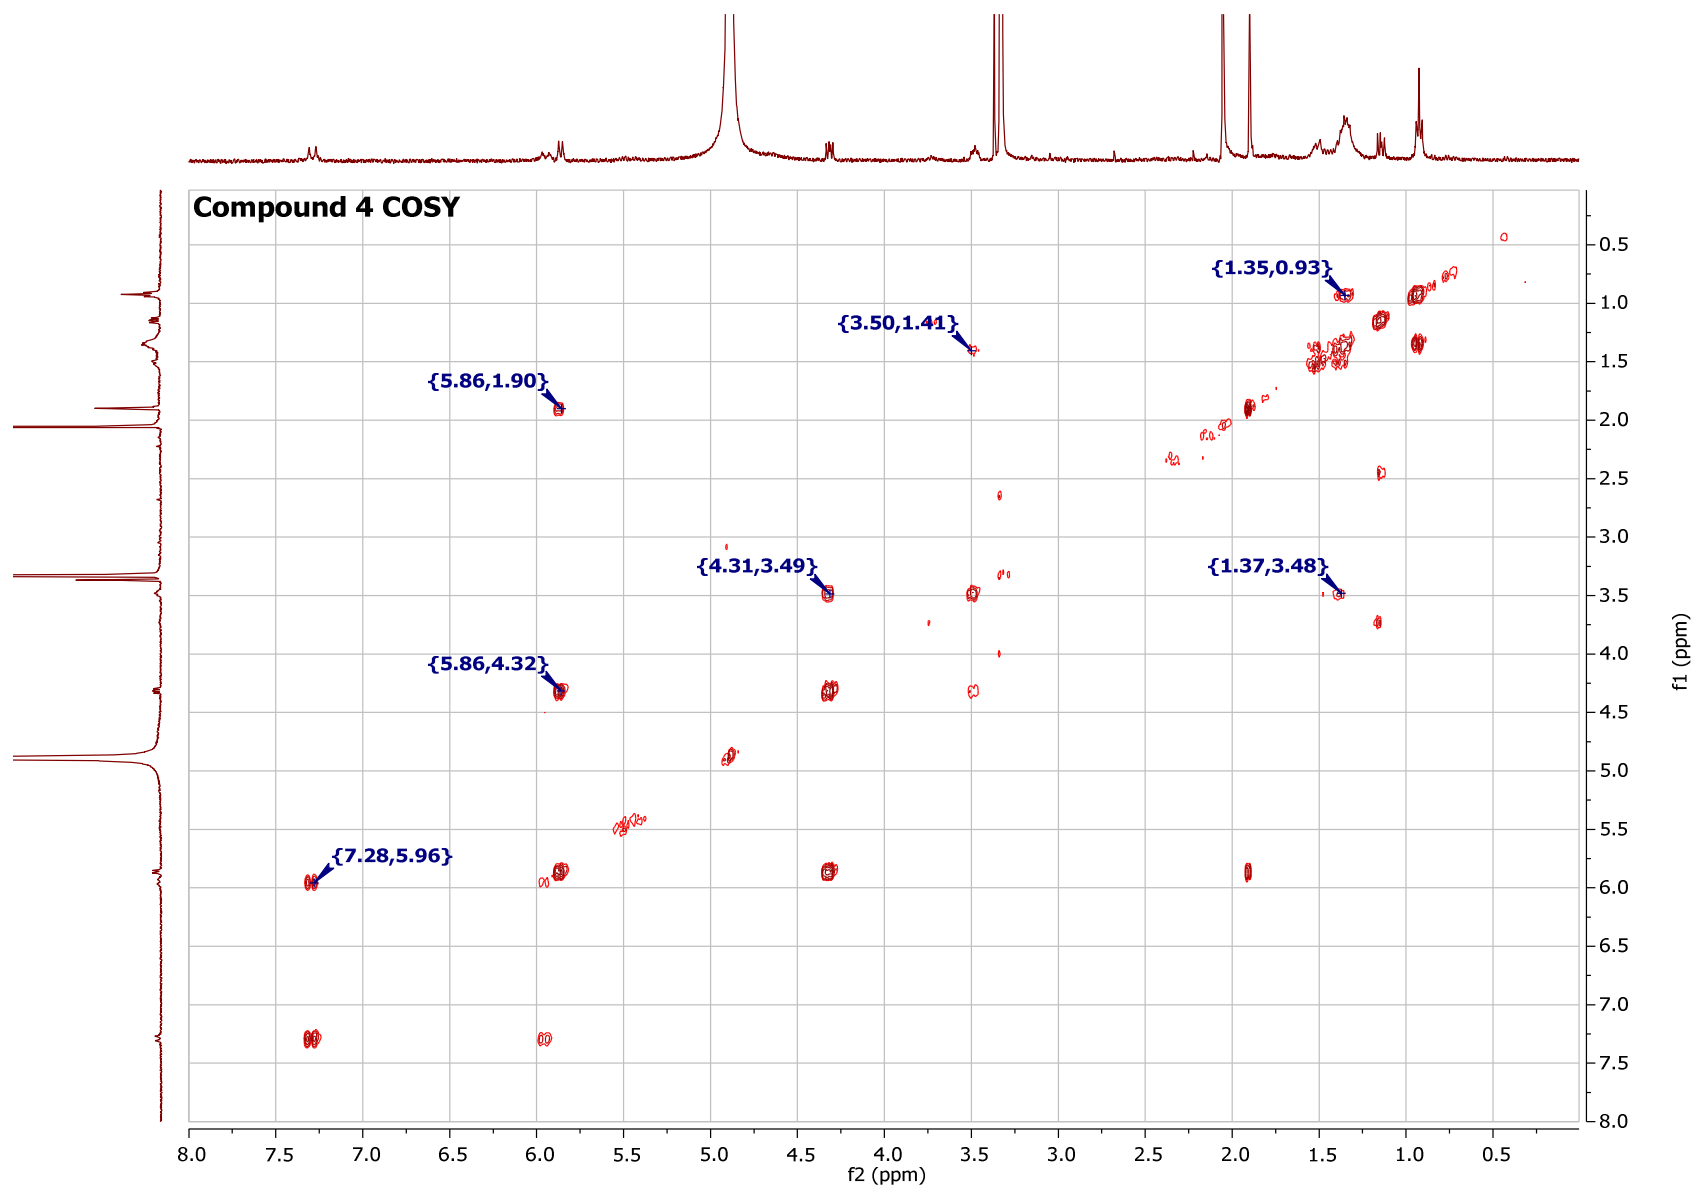

Figure S22: HMBC spectrum of compound 4 in CD<sub>3</sub>OD (400MHz)

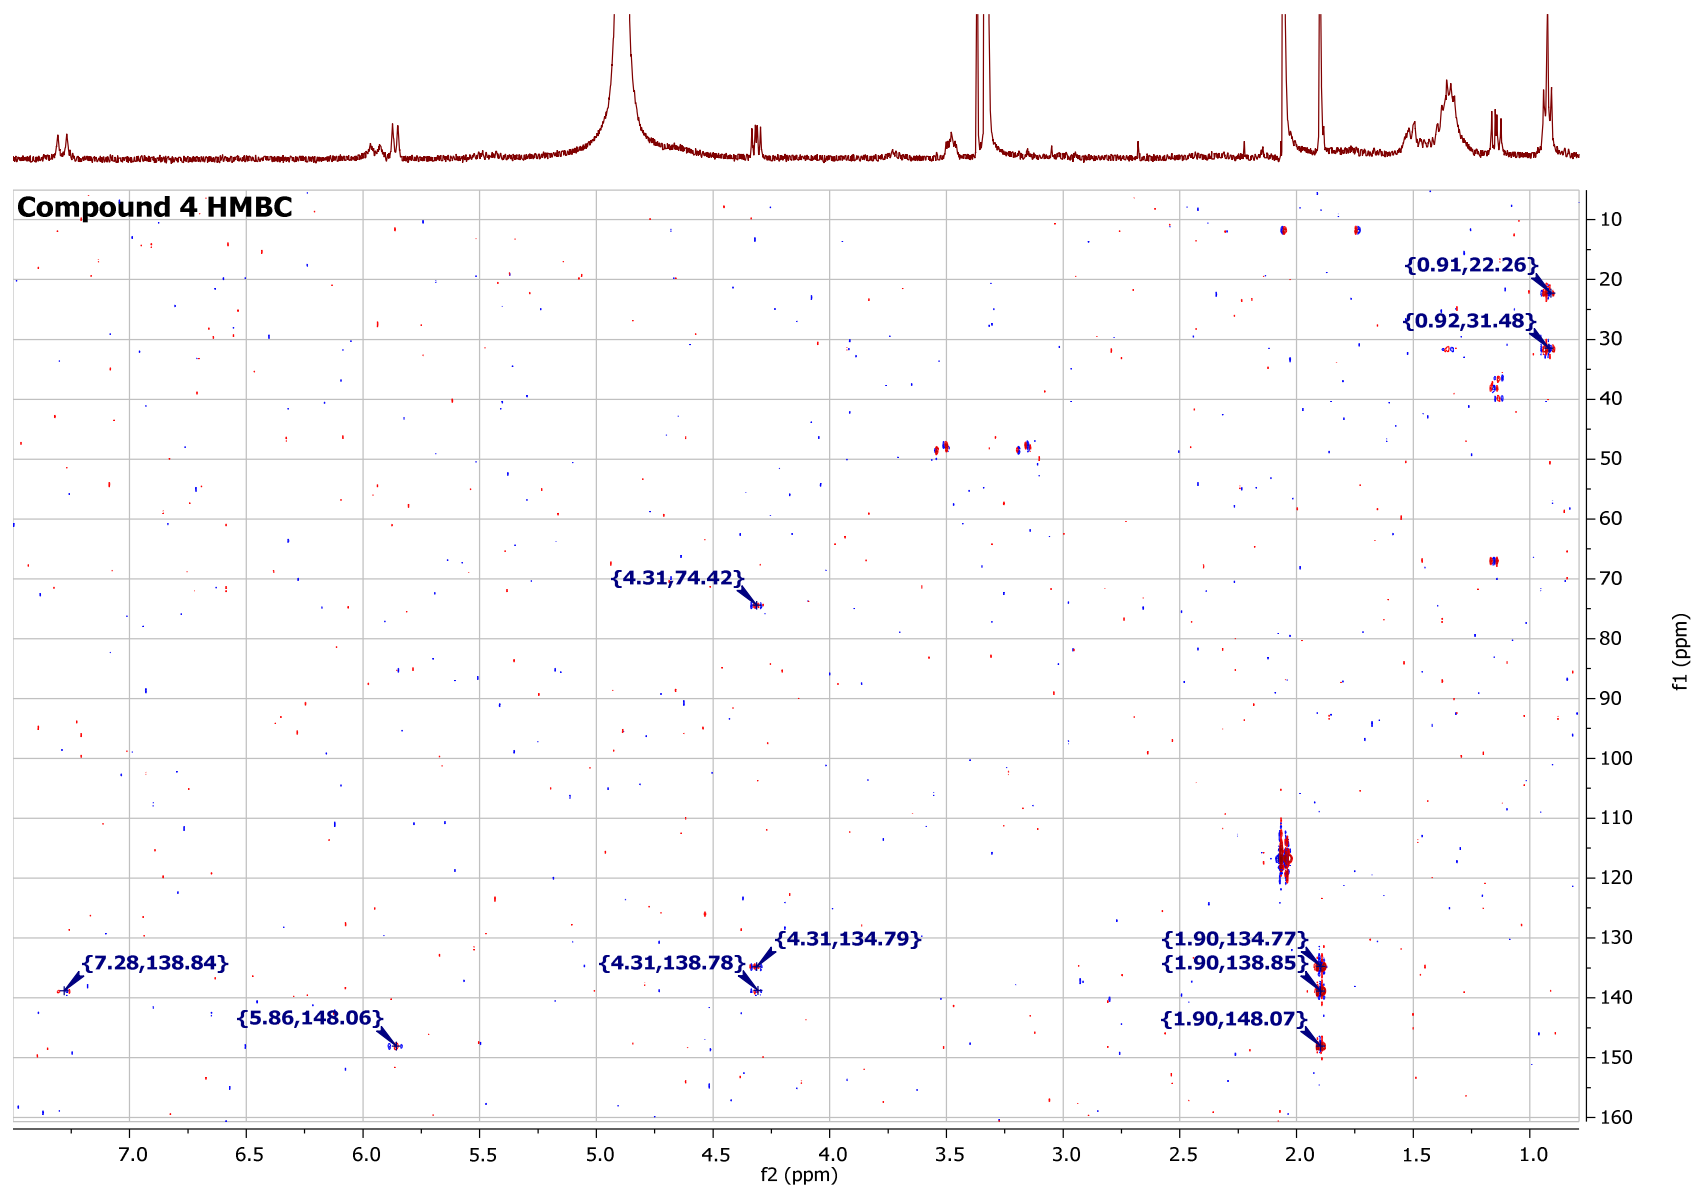

Figure S23: ROESY spectrum of compound 4 in CD<sub>3</sub>OD (400MHz)

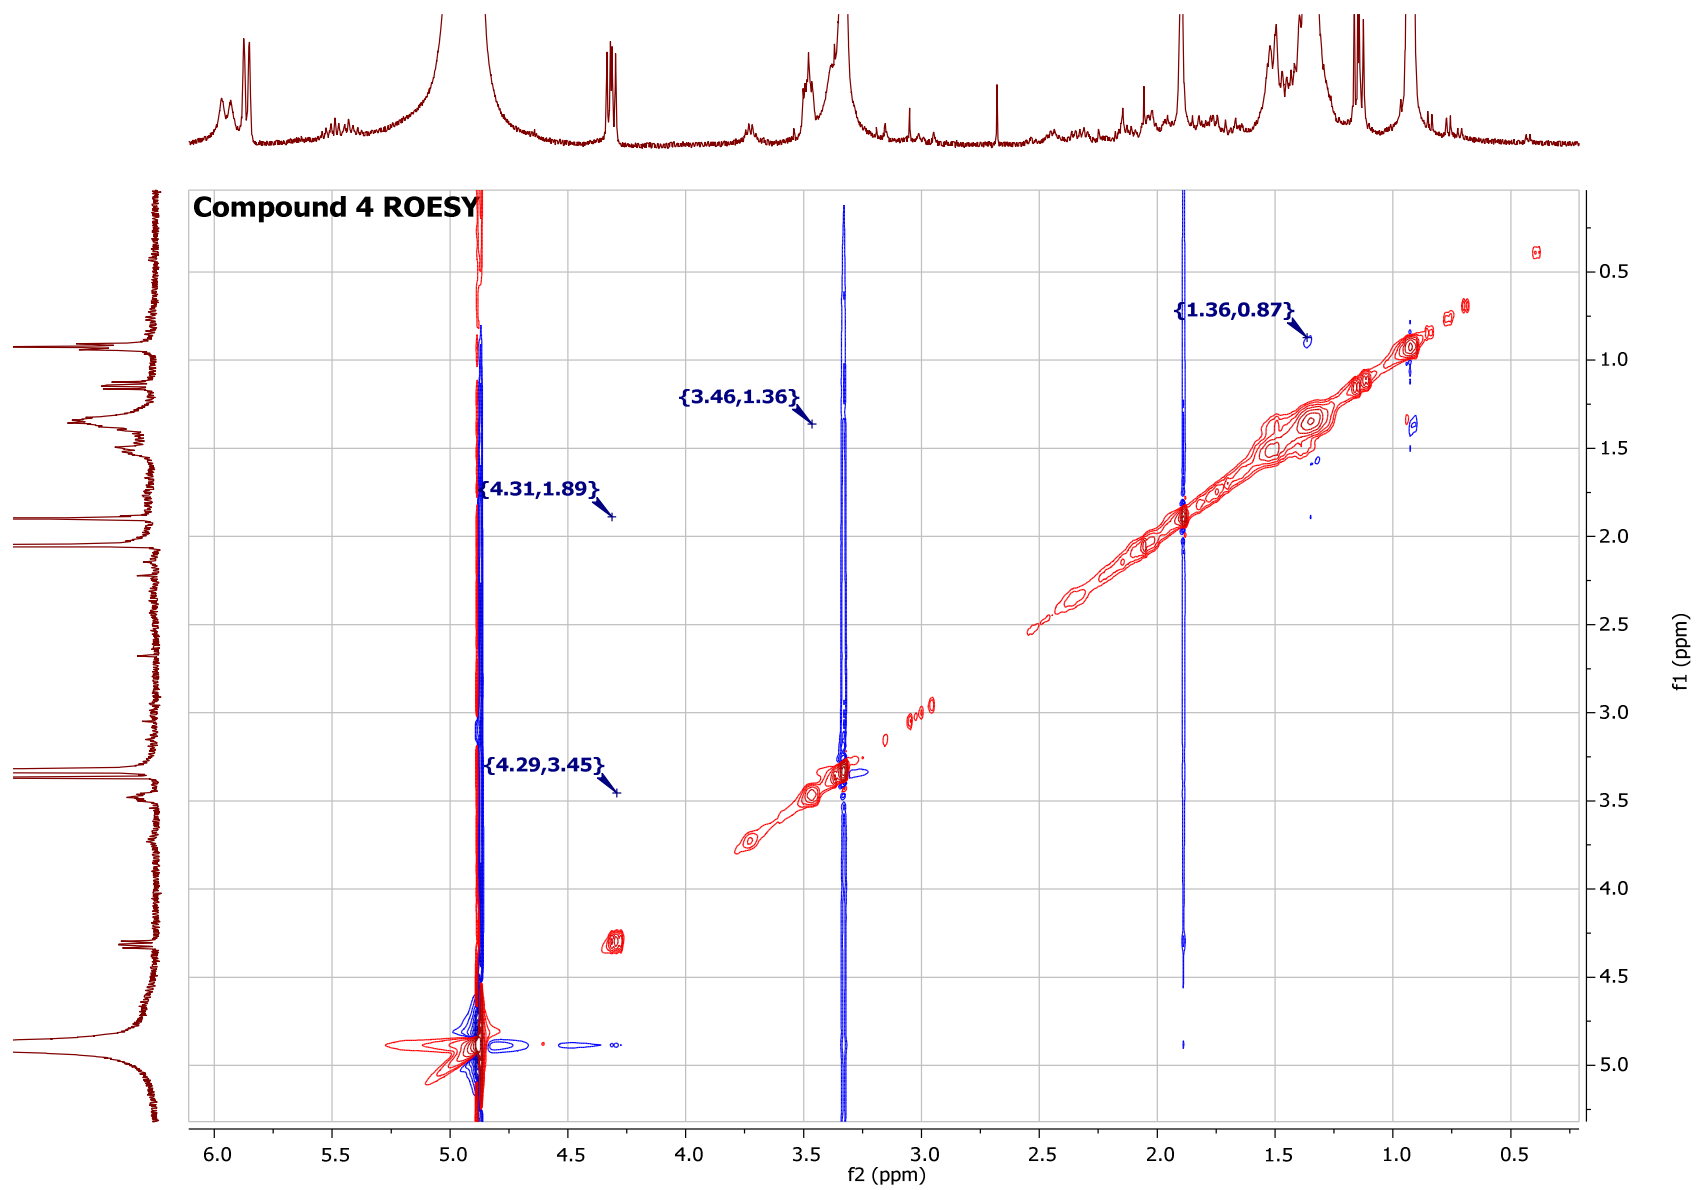

**Figure S24: HRESIMS of compound 5**

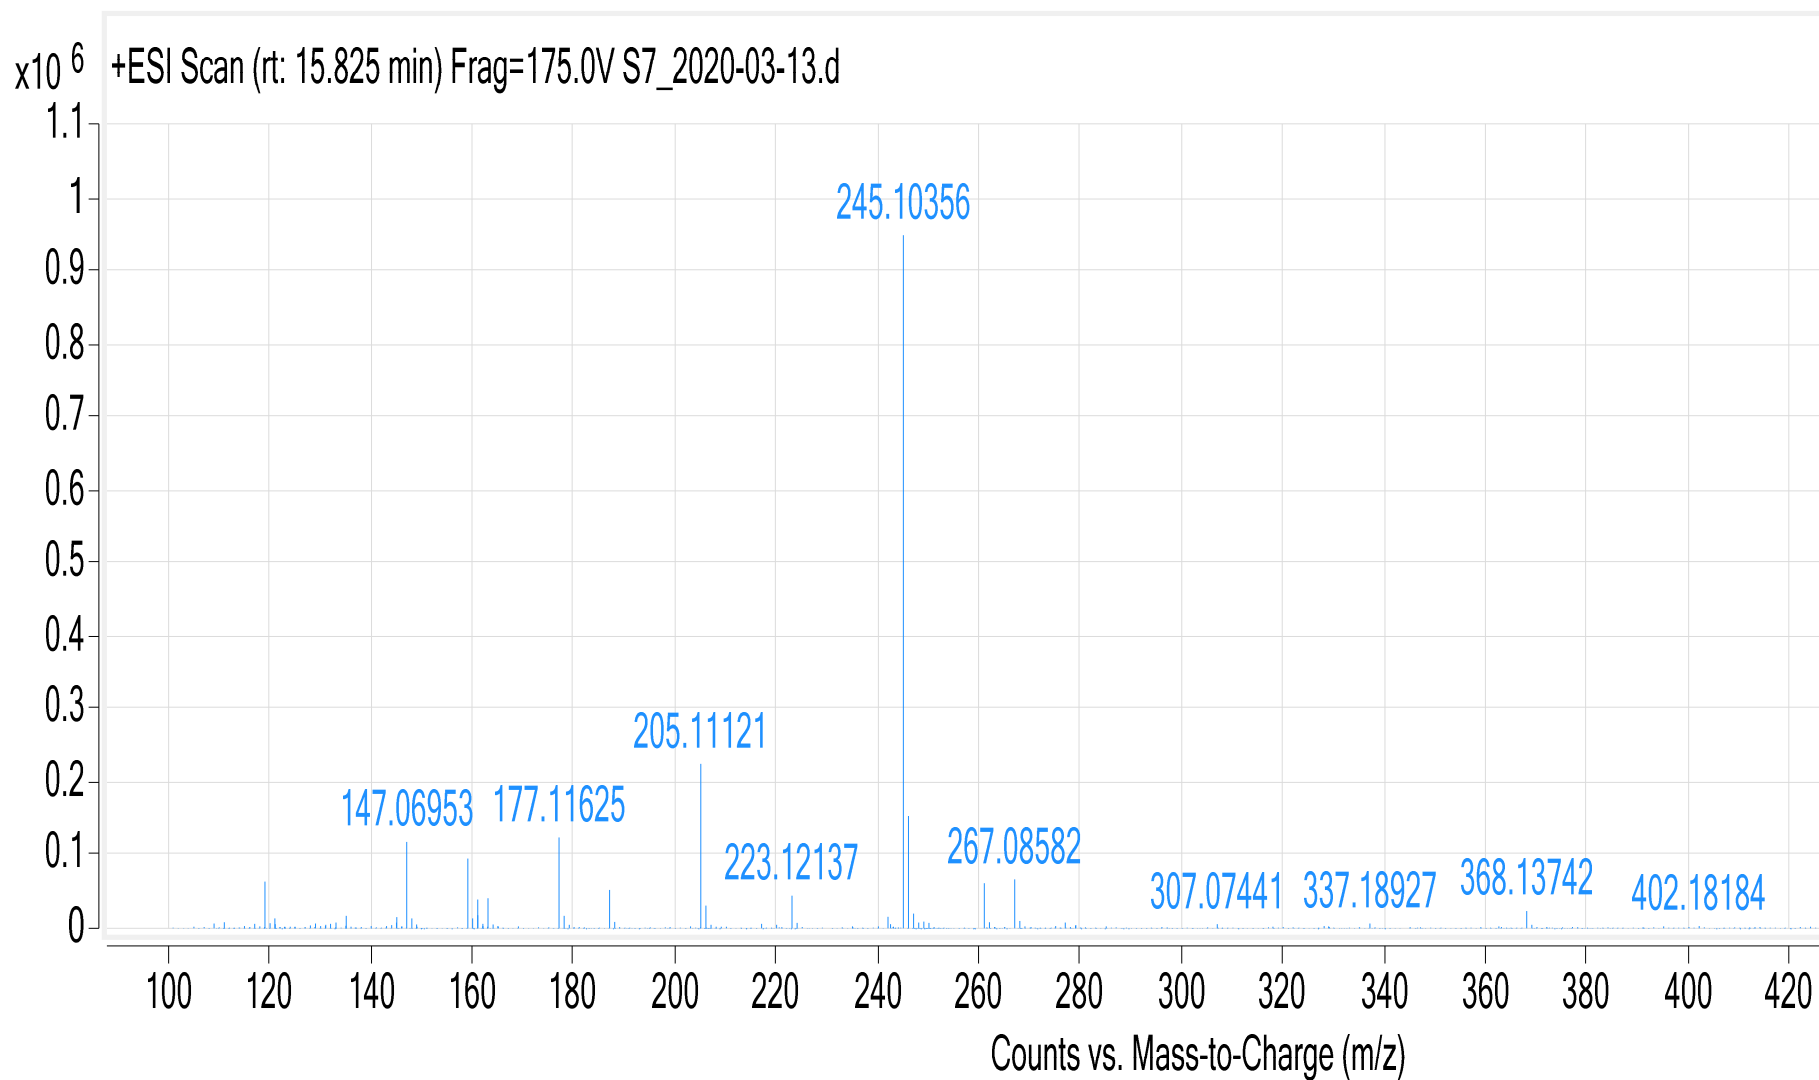

Figure S25:  $^1\text{H}$  spectrum of compound 5 in  $\text{CD}_3\text{OD}$  (400MHz)

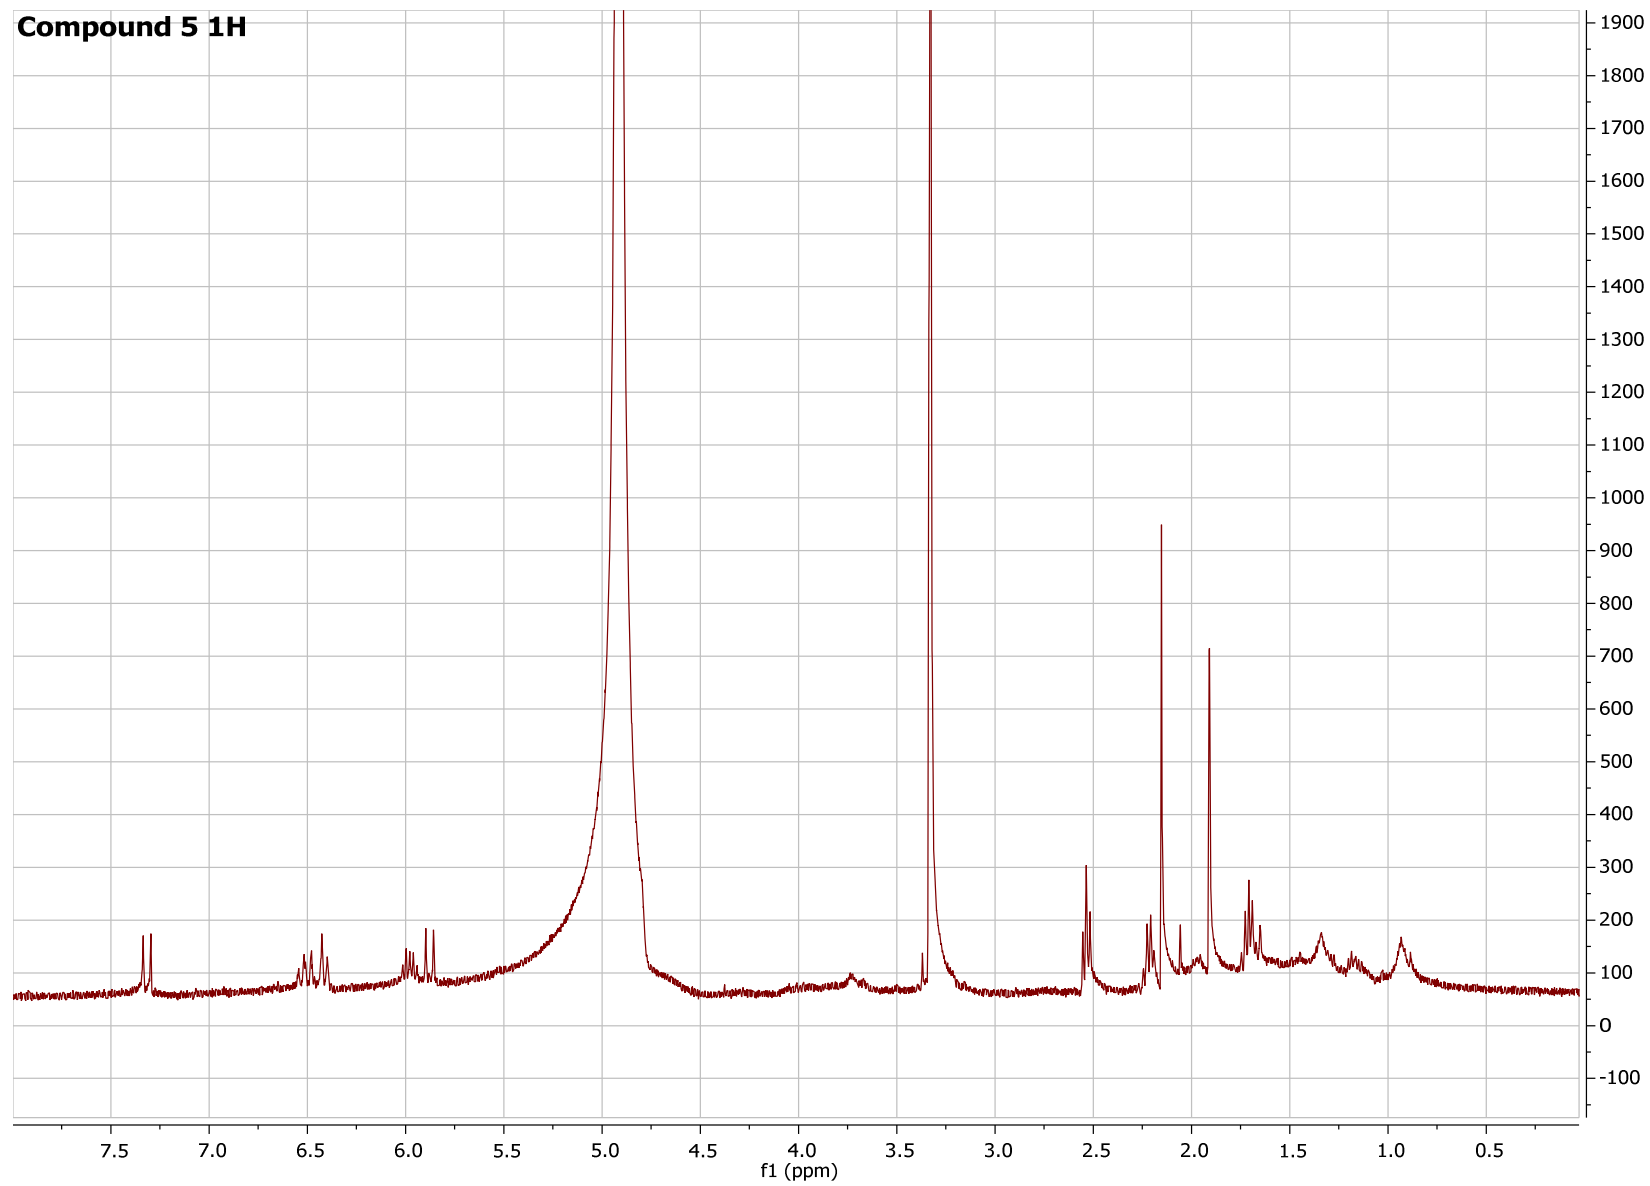

Figure S26: HSQC spectrum of compound 5 in CD<sub>3</sub>OD (400MHz)

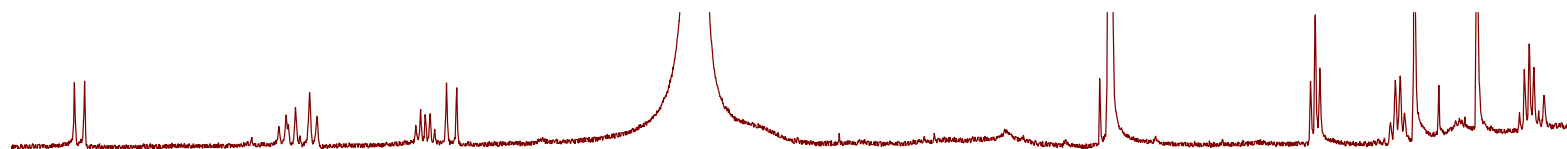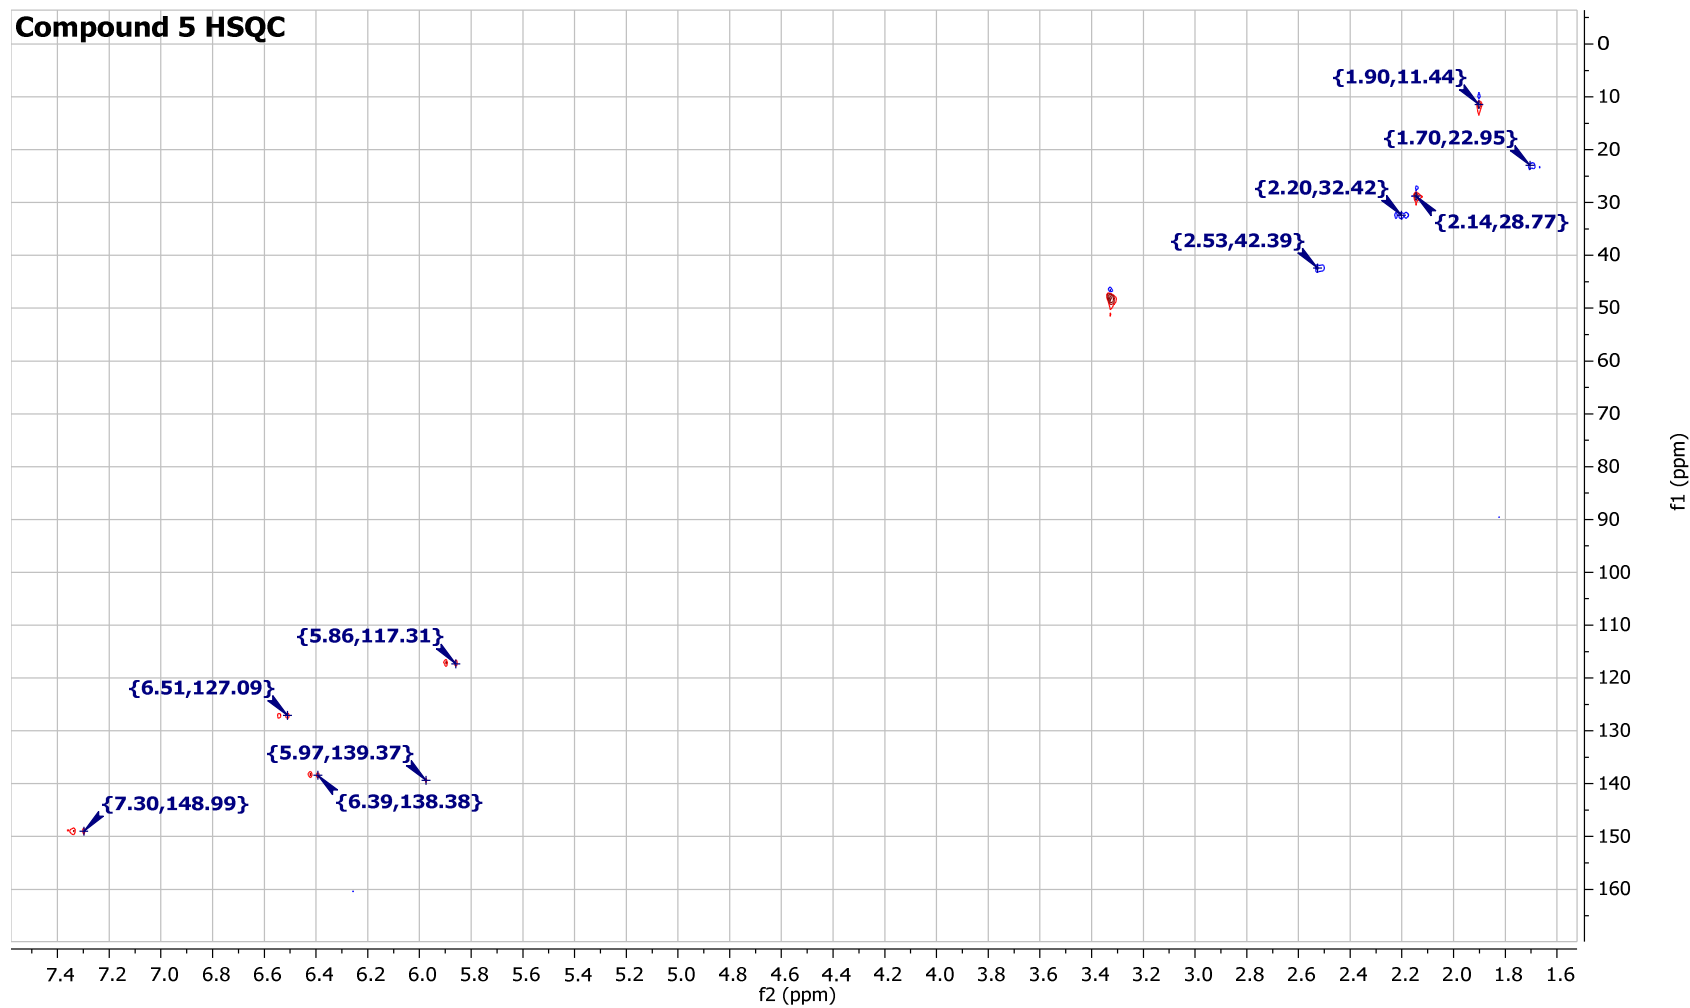

Figure S27: COSY spectrum of compound 5 in CD<sub>3</sub>OD (400MHz)

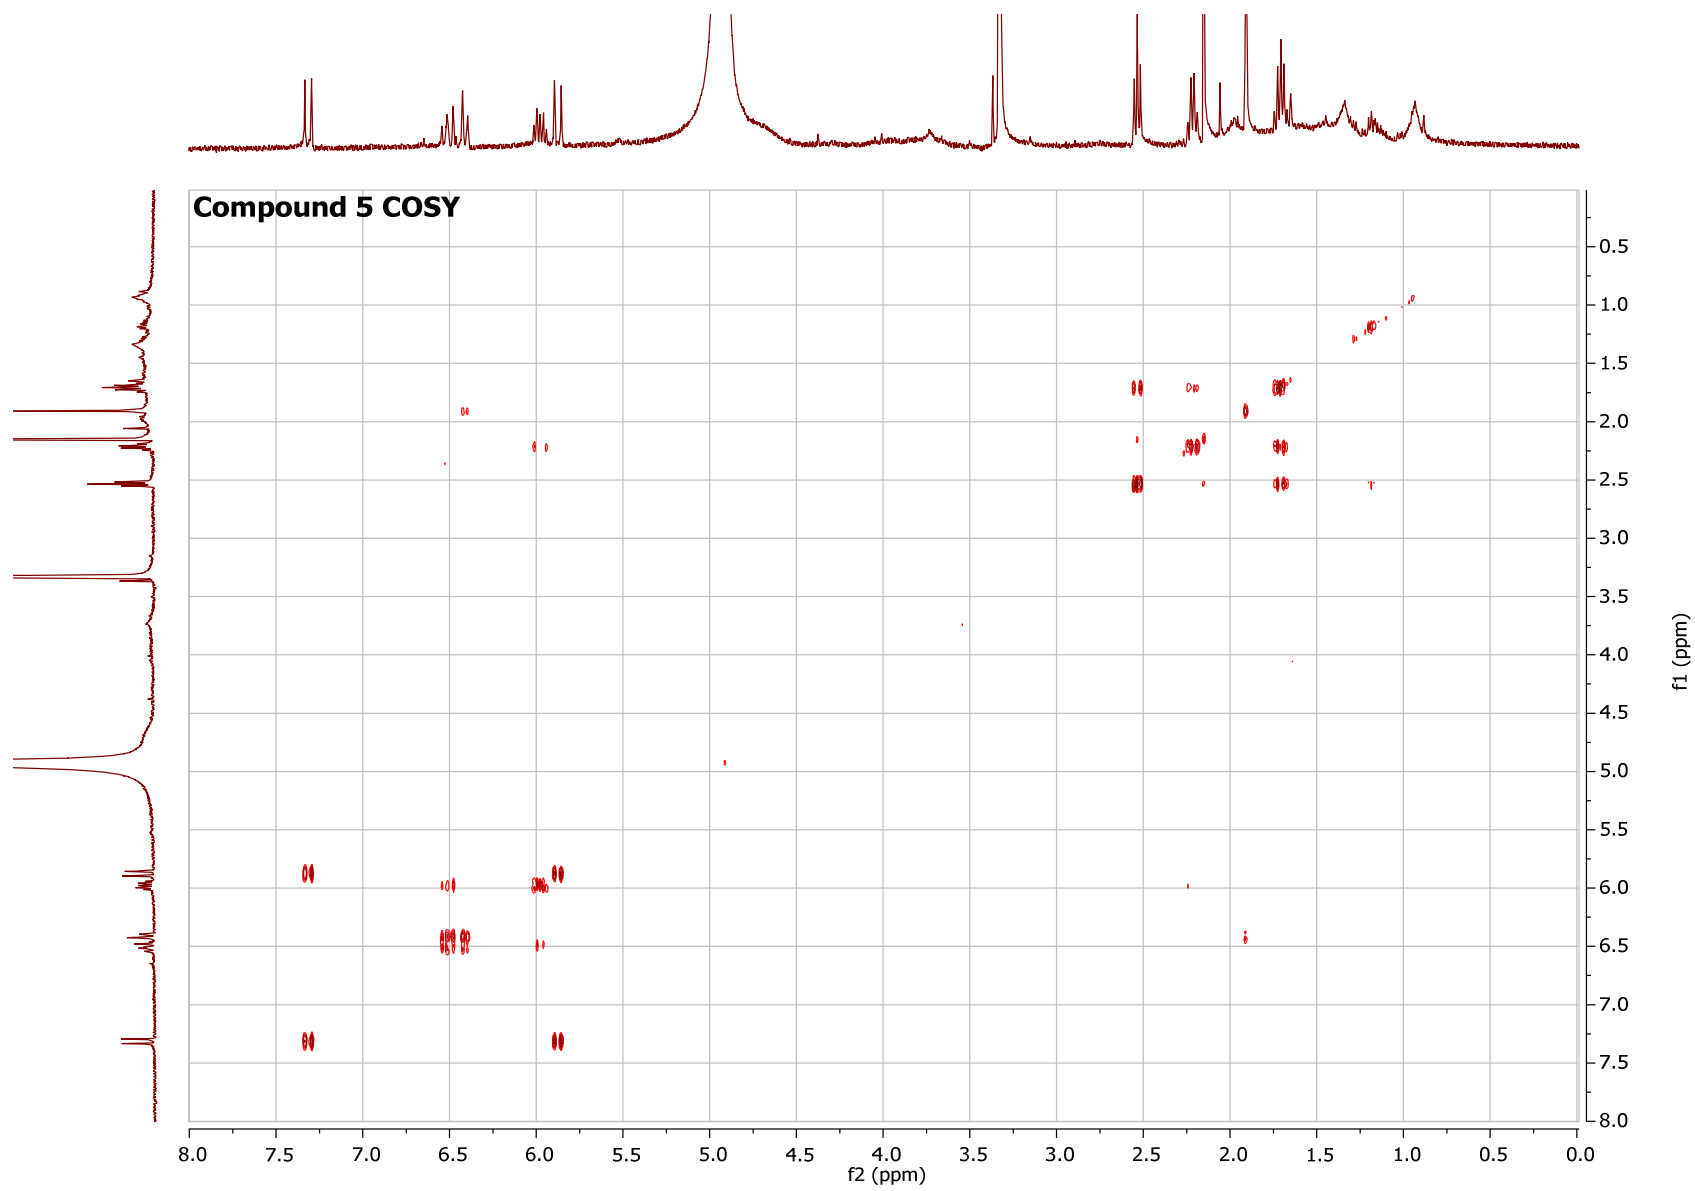

Figure S28: HMBC spectrum of compound 5 in CD<sub>3</sub>OD (400MHz)

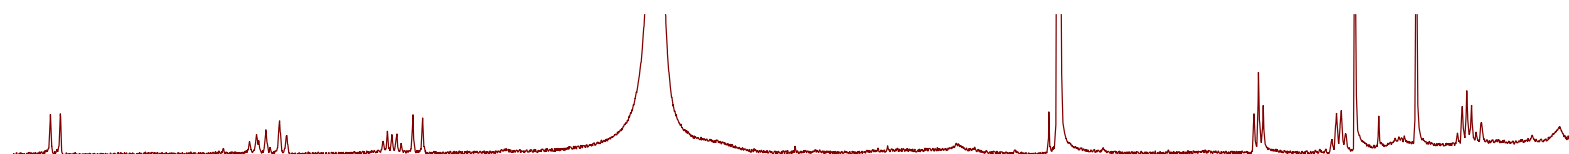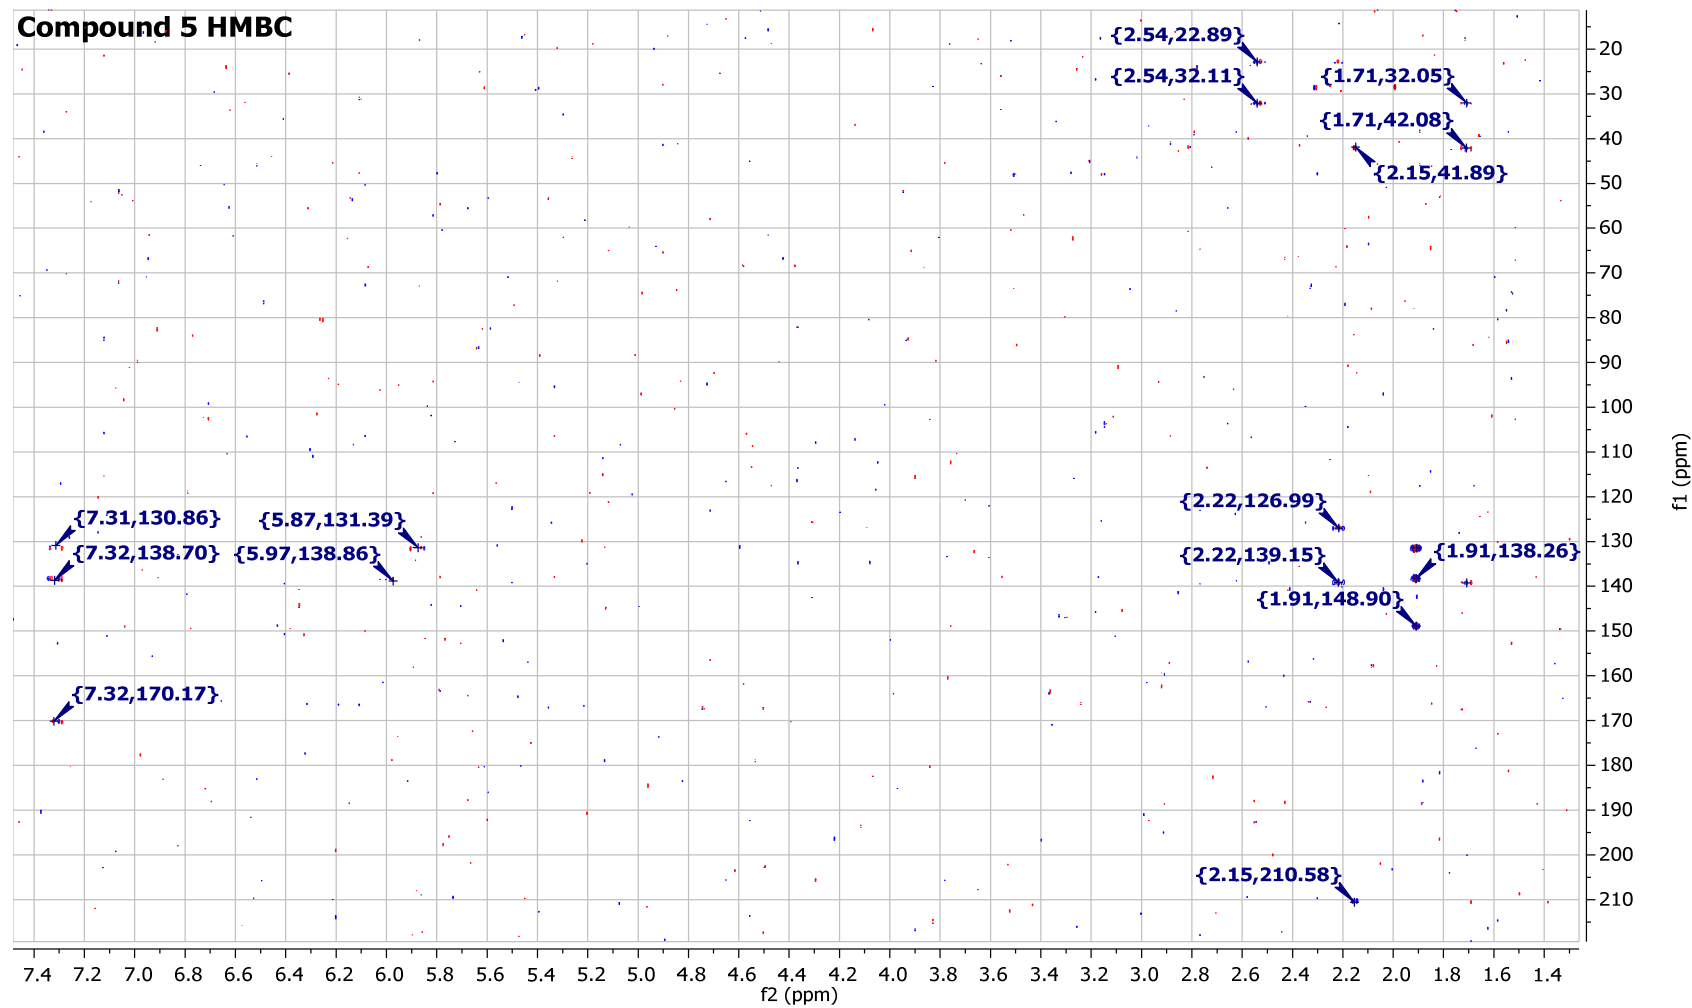



**Figure S29: HRESIMS of compound 6**

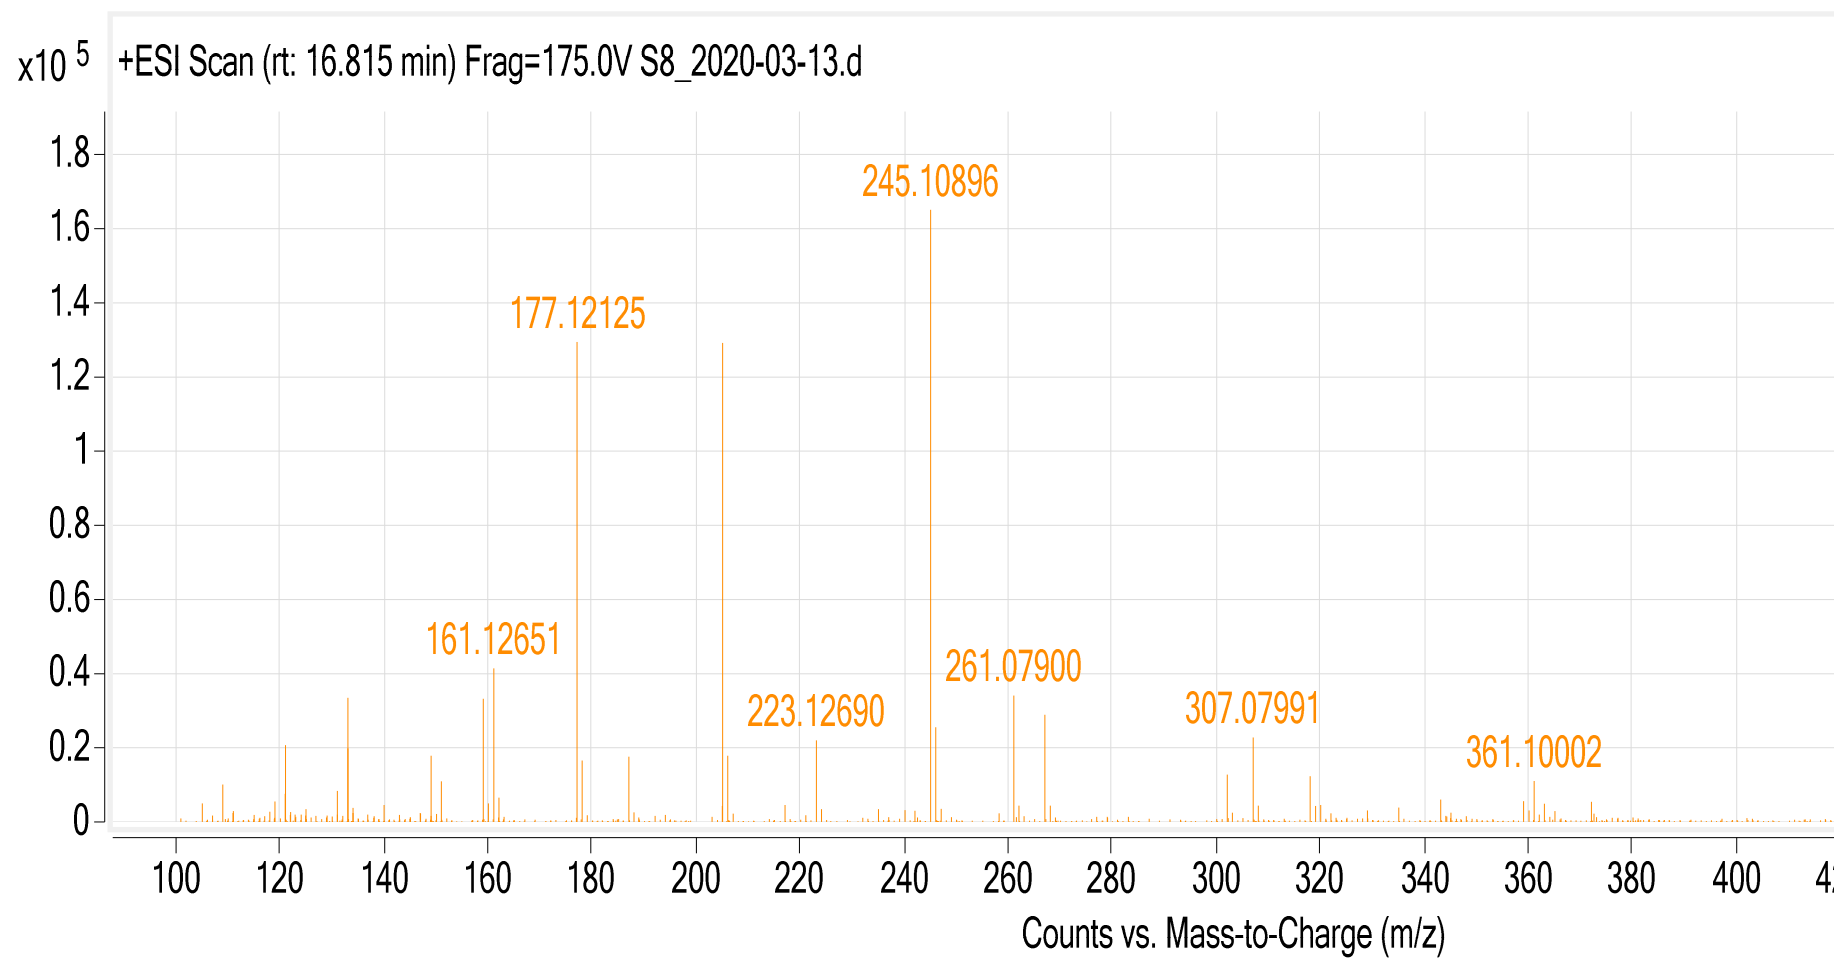

Figure S30: <sup>1</sup>H spectrum of compound 6 in CD<sub>3</sub>OD (400MHz)

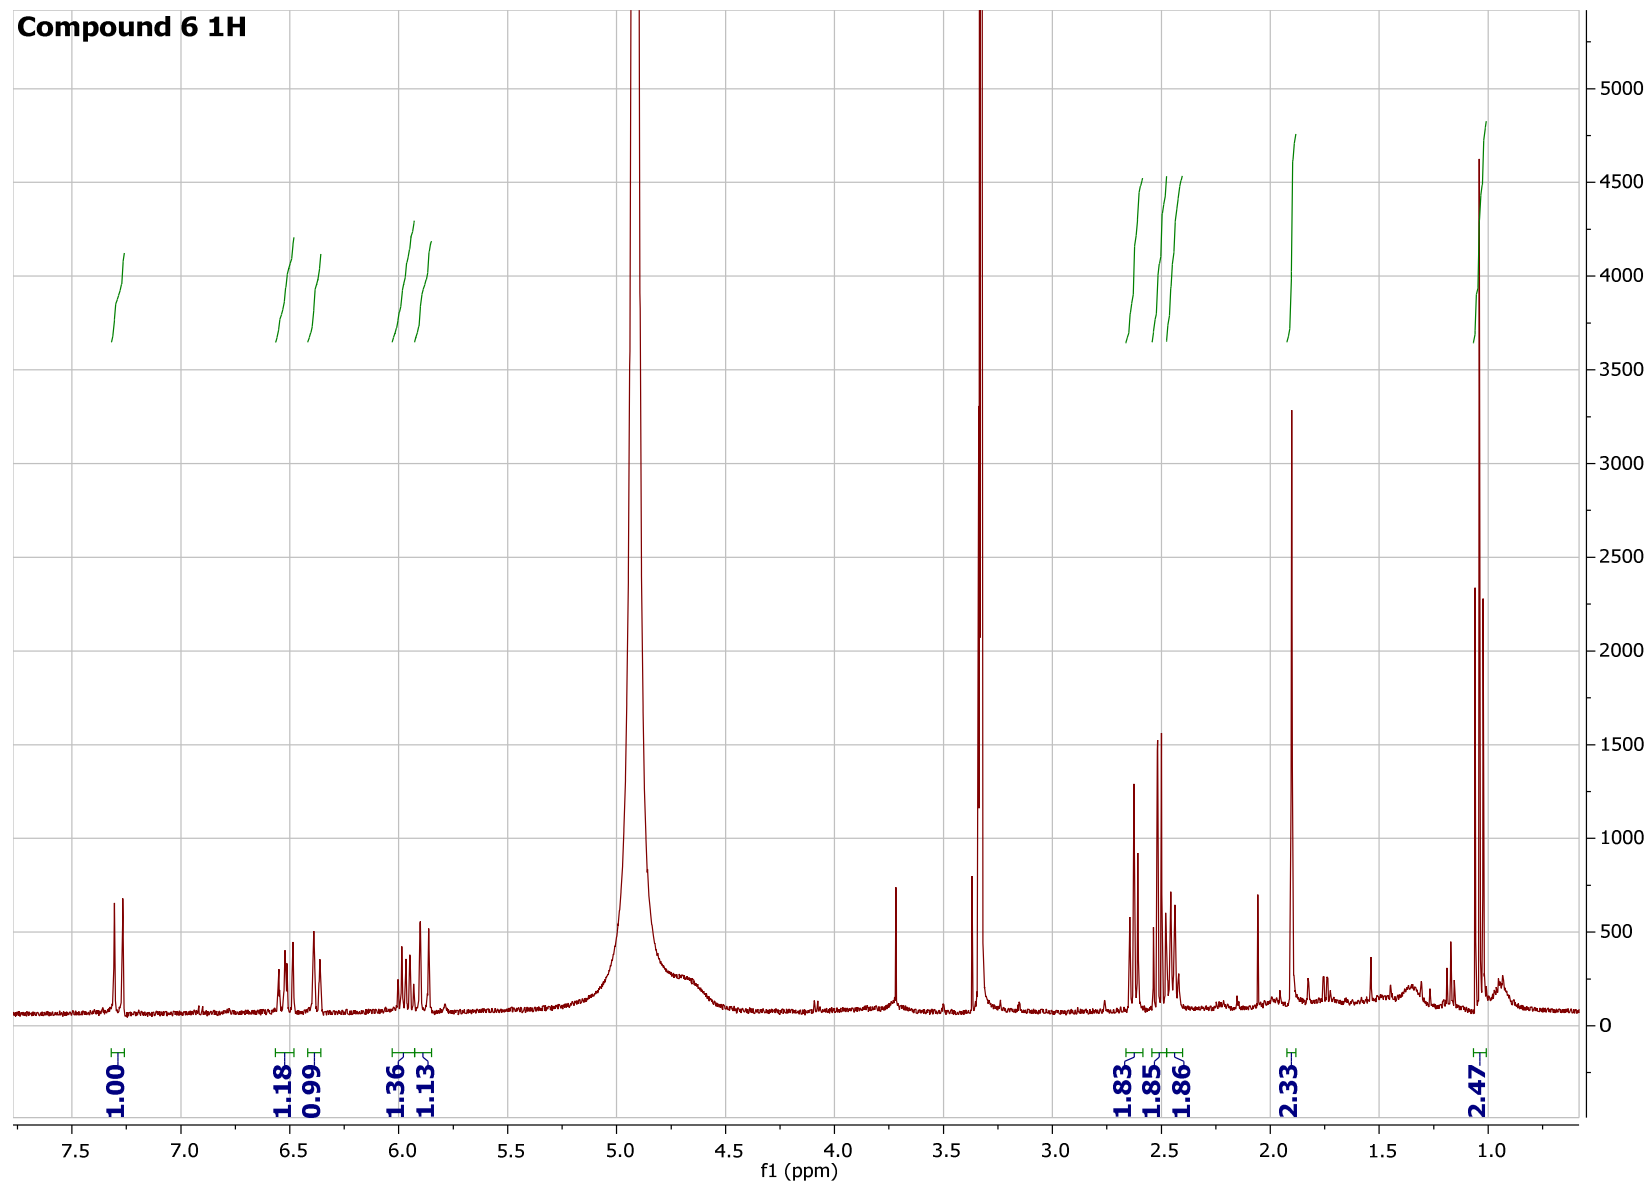

Figure S31: HSQC spectrum of compound 6 in CD<sub>3</sub>OD (400MHz)

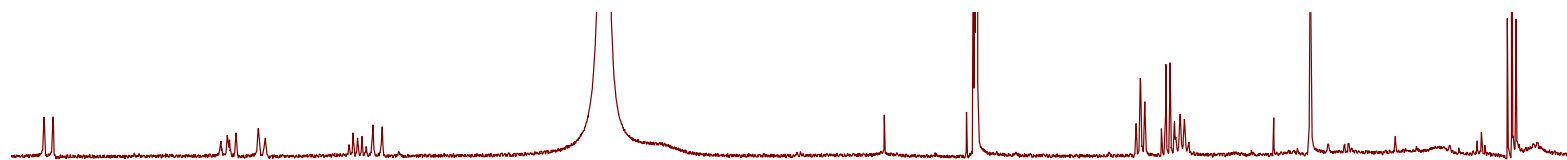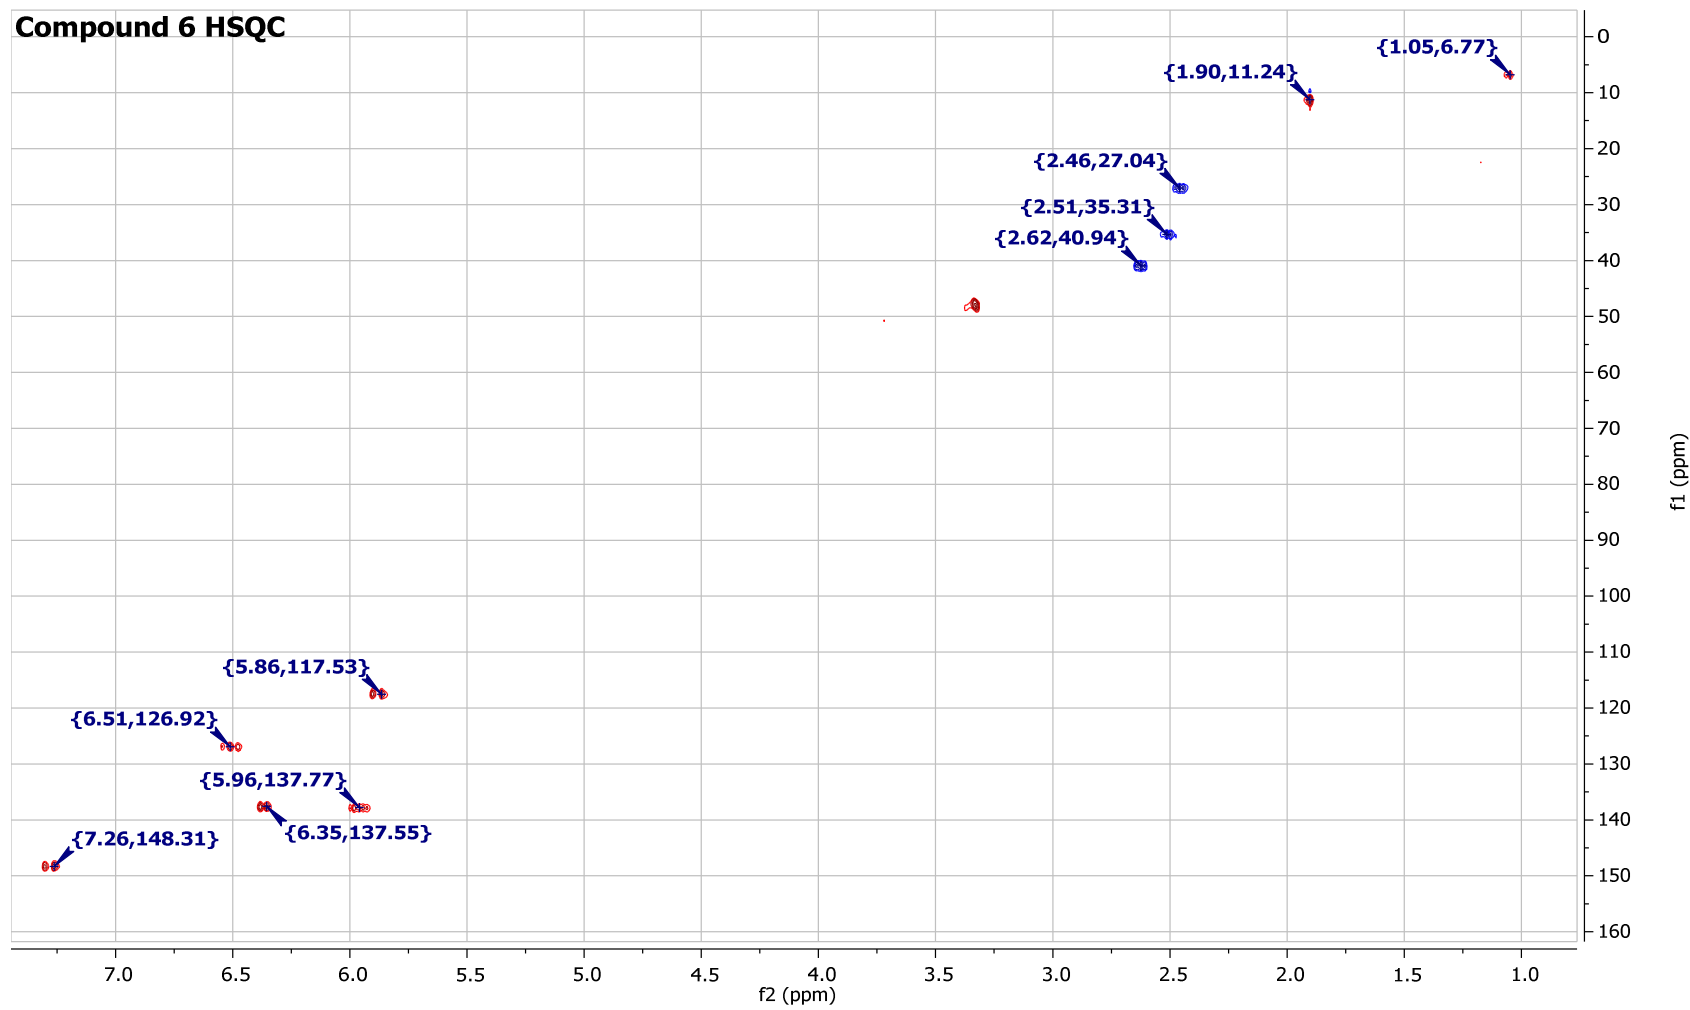

Figure S32: COSY spectrum of compound 6 in CD<sub>3</sub>OD (400MHz)

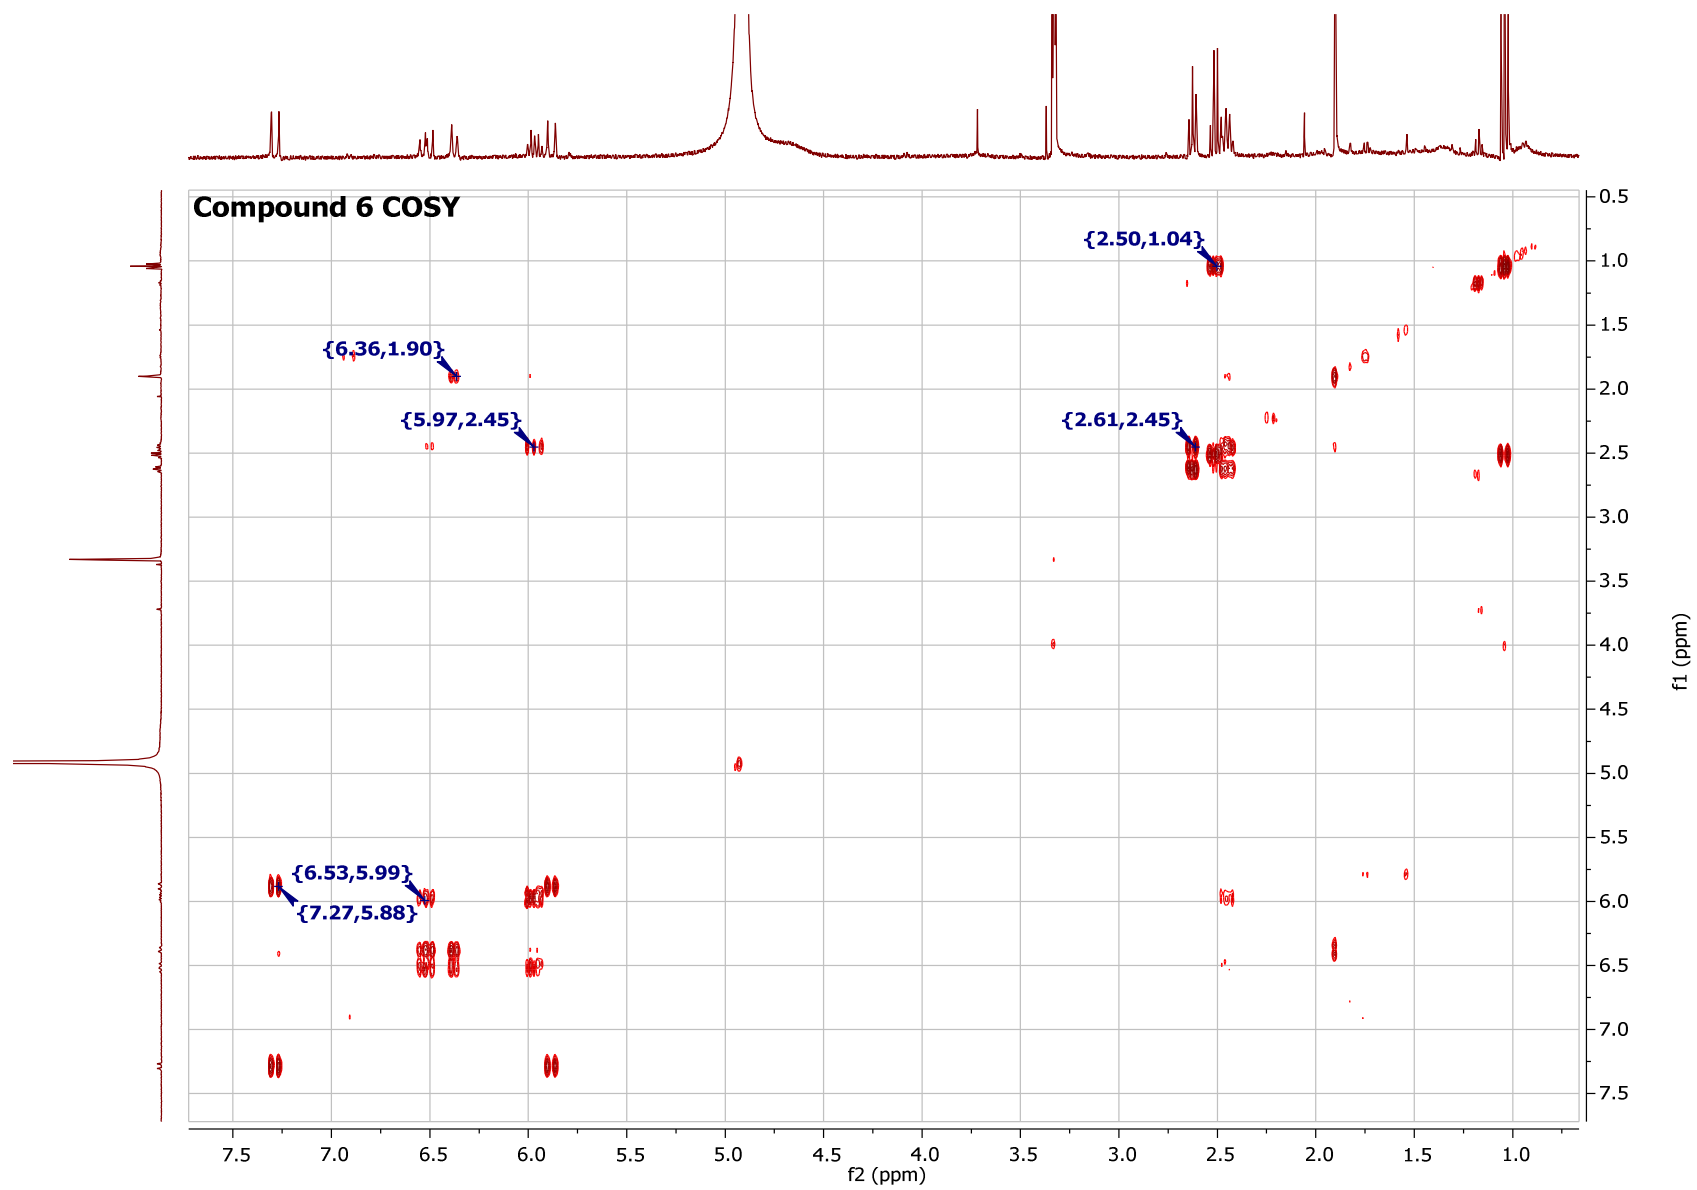

Figure S33: HMBC spectrum of compound 6 in CD<sub>3</sub>OD (400MHz)

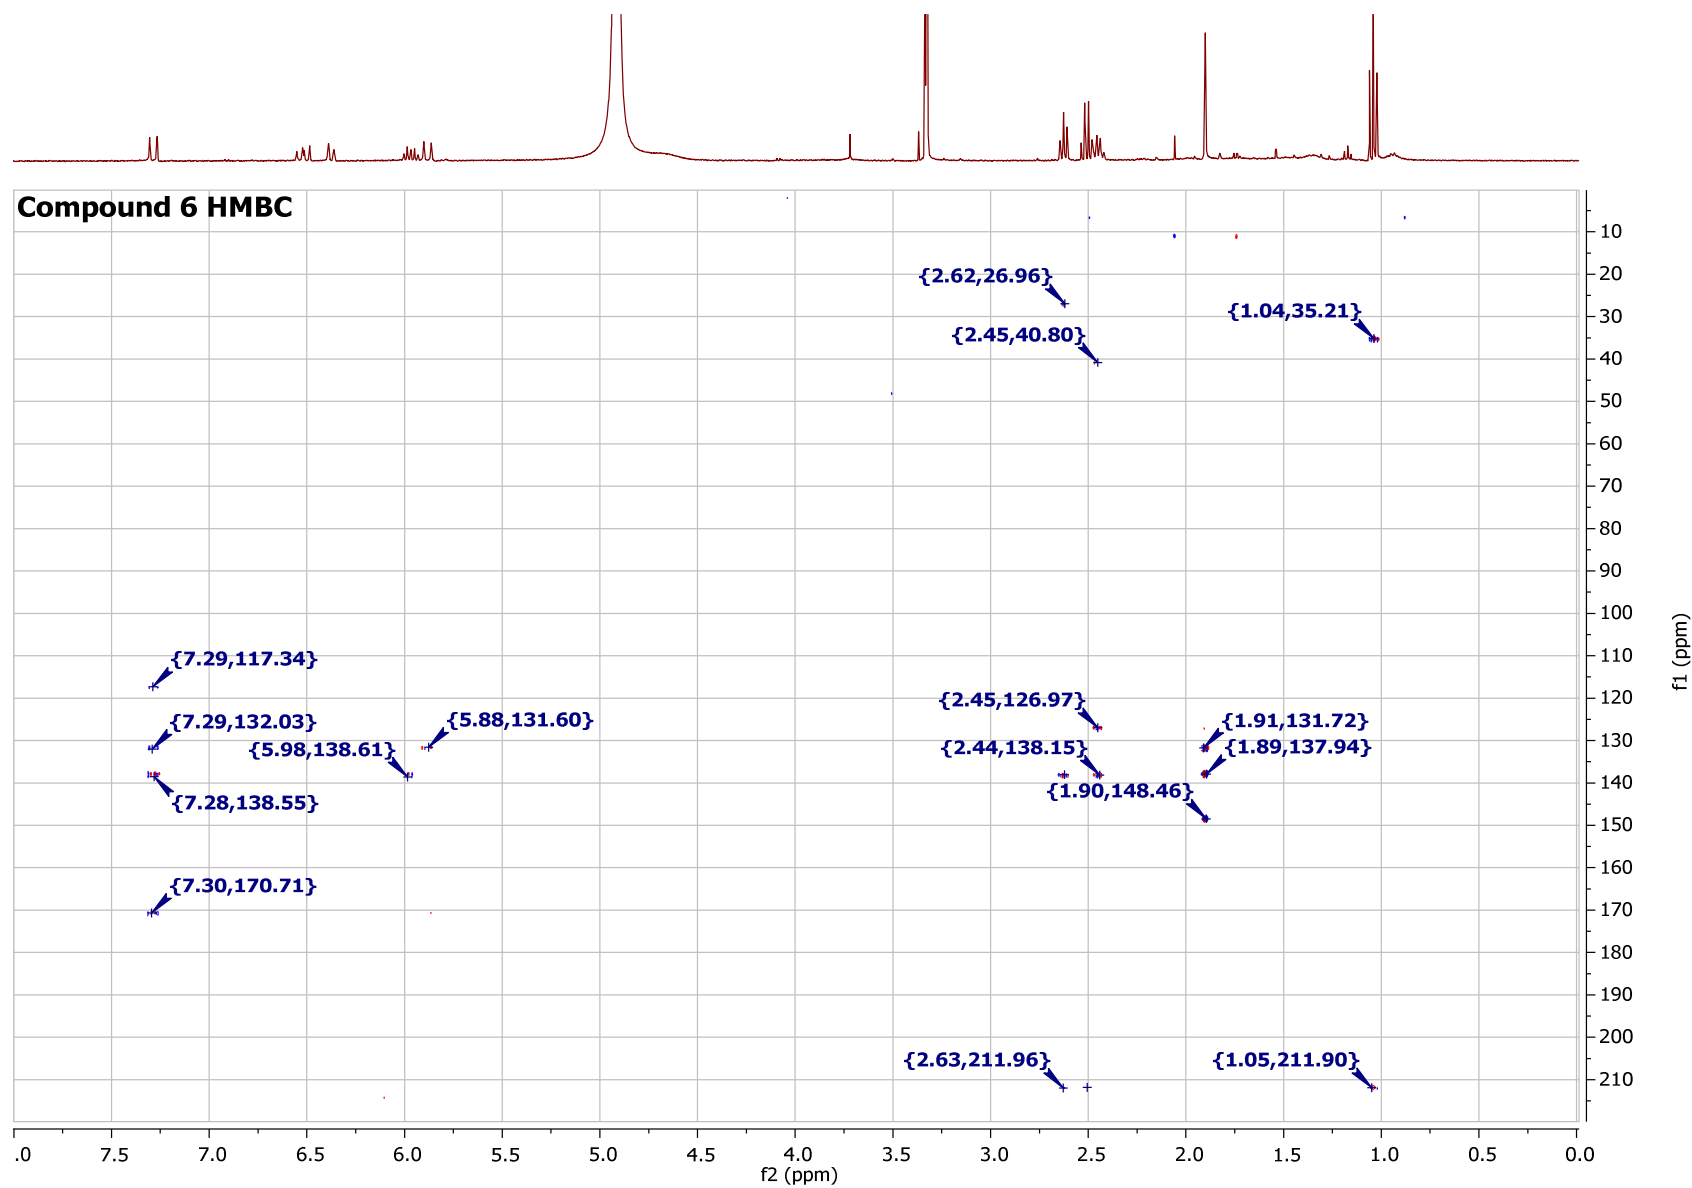

**Table S2: Activities of Kaneoheic acids A-F against *S. aureus* (ATCC® 12600™) and *Bacillus subtilis* (ATCC® 6633™)**

|                         | MIC found from Assay [µg/mL] |                                  |                                     |                          |                                  |                                     |
|-------------------------|------------------------------|----------------------------------|-------------------------------------|--------------------------|----------------------------------|-------------------------------------|
|                         | <i>S. aureus</i>             |                                  |                                     | <i>Bacillus subtilis</i> |                                  |                                     |
|                         | Compound alone               | Compound + Disulfiram [6 µg/mL ] | Compound + Chloramphenicol [1µg/mL] | Compound alone           | Compound + Disulfiram [6 µg/mL ] | Compound + Chloramphenicol [1µg/mL] |
| <b>Kaneoheic acid A</b> | NA                           | 20                               | NA                                  | NA                       | NA                               | NA                                  |
| <b>Kaneoheic acid B</b> | NA                           | 40                               | NA                                  | NA                       | 80                               | 80                                  |
| <b>Kaneoheic acid C</b> | NA                           | 40                               | NA                                  | NA                       | 40                               | 40                                  |
| <b>Kaneoheic acid D</b> | NA                           | 10                               | NA                                  | NA                       | 80                               | 80                                  |
| <b>Kaneoheic acid E</b> | NA                           | 10                               | NA                                  | NA                       | 40                               | 80                                  |
| <b>Kaneoheic acid F</b> | NA                           | 20                               | NA                                  | NA                       | 40                               | 40                                  |

**NA → Not Active**

**Table S3: Activities of Small to medium chain fatty acids against *S. aureus* (ATCC® 12600<sup>TM</sup>) and *B. subtilis* (ATCC® 6633<sup>TM</sup>)**

| # | Fatty Acids                              | MIC found from Assay [µg/mL] |                                  |                                     |                          |                                  |                                     |
|---|------------------------------------------|------------------------------|----------------------------------|-------------------------------------|--------------------------|----------------------------------|-------------------------------------|
|   |                                          | <i>S. aureus</i>             |                                  |                                     | <i>Bacillus subtilis</i> |                                  |                                     |
|   |                                          | Compound alone               | Compound + Disulfiram [6 µg/mL ] | Compound + Chloramphenicol [1µg/mL] | Compound alone           | Compound + Disulfiram [6 µg/mL ] | Compound + Chloramphenicol [1µg/mL] |
| 1 | <b>Butyric acid [Na salt]<br/>MW 110</b> | 1100                         | 550                              | 550                                 | 550                      | 137.5                            | 137.5                               |
| 2 | <b>Capric acid [Na salt]<br/>MW 194</b>  | 121.2                        | 121.2                            | 121.2                               | 485                      | 242.5                            | 242.5                               |
| 3 | <b>Lauric acid<br/>MW 200</b>            | 63                           | 63                               | 63                                  | 126                      | 63                               | 63                                  |
| 4 | <b>Myristic acid<br/>MW 228</b>          | 570                          | 285                              | 570                                 | 285                      | 142.5                            | 142.5                               |
| 5 | <b>Linoleic acid<br/>MW 280</b>          | 700                          | 88.2                             | 350                                 | 215.6                    | 215.6                            | 215.6                               |
